# Supplementary material for: Rh-catalyzed oxidative C–C bond formation and C–N bond cleavage: direct access to C2-olefinated free (NH)-indoles and pyrroles
Source: Royal Society of Chemistry journal article supplement (doi:10.1039/c3ob42605j), 2014-01-01

## Supplementary Information

# Rh-catalyzed oxidative C-C bond formation and C-N bond cleavage: direct access to C2-olefinated free (NH)-indoles and pyrroles

Satyasheel Sharma, Sangil Han, Mirim Kim, Neeraj Kumar Mishra, Jihye Park, Youngmi Shin, Jimin Ha, Jong Hwan Kwak, Young Hoon Jung and In Su Kim \*

*School of Pharmacy, Sungkyunkwan University, Suwon 440-746, Republic of Korea*

\* Corresponding author. Tel.: +82-31-290-7788; fax: +82-31-292-8800; e-mail: [insukim@skku.edu](mailto:insukim@skku.edu)

### List of the Contents

|                                                                                                                                                                           |         |
|---------------------------------------------------------------------------------------------------------------------------------------------------------------------------|---------|
| General methods .....                                                                                                                                                     | S2      |
| General procedure for the synthesis of <i>N-p</i> -tolyl-1 <i>H</i> -indole-1-carboxamide and <i>N-p</i> -tolyl-1 <i>H</i> -indole-1-carboxamide (1a, 1f–1r and 5a) ..... | S3      |
| Typical procedure for the synthesis of alkenylated product (3a, 3f–3p, 4b–4l and 6a–c) .....                                                                              | S3      |
| Selected optimization for the reaction conditions .....                                                                                                                   | S4      |
| Characterization data for starting materials (1a, 1f–1r and 5a) .....                                                                                                     | S5–S12  |
| Characterization data for products (3a, 3f–3p, 4b–4l and 6a–c) .....                                                                                                      | S13–S22 |
| Procedure for tricyclic indolic compound (3aa) and characterization .....                                                                                                 | S23     |
| <sup>1</sup> H NMR and <sup>13</sup> C NMR copies of all products .....                                                                                                   | S24–S66 |
| NOE data for compound 4j .....                                                                                                                                            | S60     |

## General methods

Commercially available reagents were used without additional purification, unless otherwise stated. Sealed tubes ( $13 \times 100 \text{ mm}^2$ ) were purchased from Fischer Scientific and dried in oven for overnight and cooled at room temperature prior to use. Thin layer chromatography was carried out using plates coated with Kieselgel 60F<sub>254</sub> (Merck). For flash column chromatography, E. Merck Kieselgel 60 (230–400 mesh) was used. Nuclear magnetic resonance spectra (<sup>1</sup>H and <sup>13</sup>C NMR) were recorded on a Bruker Unity 700 MHz spectrometer for CDCl<sub>3</sub> and DMSO-d<sub>6</sub> solution and chemical shifts are reported as parts per million (ppm). Resonance patterns are reported with the notations s (singlet), d (doublet), t (triplet), q (quartet), and m (multiplet). In addition, the notation br is used to indicate a broad signal. Coupling constants (*J*) are reported in hertz (Hz). IR spectra were recorded on a Varian 2000 Infrared spectrophotometer and are reported as cm<sup>-1</sup>. High-resolution mass spectra (HRMS) were recorded on a JEOL JMS-600 spectrometer.

### **General procedure for the synthesis of *N-p*-tolyl-1*H*-indole-1-carboxamide and *N-p*-tolyl-1*H*-indole-1-carboxamide (1a, 1f–1r and 5a)**

To a stirred suspension of indole or pyrrole (1.0 equiv.) in dry DMF (30 mL) was added NaH (60% dispersion in mineral oil, 2.0 equiv.) at 0 °C under N<sub>2</sub> atmosphere. The reaction mixture was then stirred at room temperature for 3 h and *p*-tolyl isocyanate (1.5 equiv.) was added dropwise. The reaction mixture was then stirred at room temperature for overnight. The reaction mixture was washed with H<sub>2</sub>O and extracted with EtOAc (50 mL). The organic layer was then washed with an aqueous solution of 1 N HCl (50 mL). The organic layer was dried over Mg<sub>2</sub>SO<sub>4</sub> and concentrated in vacuo. The residue was purified by flash column chromatography.

### **Typical procedure for the synthesis of alkenylated product (3a, 3f–3p, 4b–4l, and 6a–c)**

To an oven-dried sealed tube charged with *N-p*-tolyl-1*H*-indole-1-carboxamide (**1a**) (37.5 mg, 0.15 mmol, 100 mol%), [RhCp\*Cl<sub>2</sub>]<sub>2</sub> (2.3 mg, 0.0037 mmol, 2.5 mol %), AgSbF<sub>6</sub> (5.2 mg, 0.015 mmol, 10 mol %), and Cu(OAc)<sub>2</sub>·H<sub>2</sub>O (60 mg, 0.3 mmol, 200 mol %) was added ethyl acrylate (**2a**) (32 μL, 0.3 mmol, 200 mol %) and *t*-amyl alcohol (1 mL). The reaction mixture was allowed to stir for 20 h at 100 °C. The reaction mixture was diluted with EtOAc (10 mL) and concentrated in vacuo. The residue was purified by flash column chromatography (*n*-hexanes/EtOAc = 25:1) to afford the alkenylated product **3a** (25.1 mg) in 78% yield.

### Selected optimization for the reaction conditions

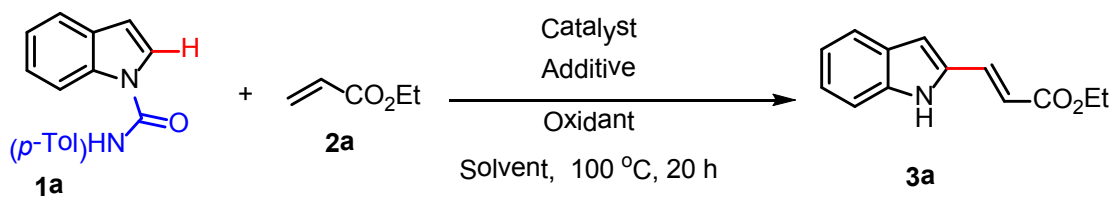

| entry    | catalyst (mol %)                               | oxidant (equiv)                               | additive (mol %)              | solvent              | yield (%) of <b>3a</b> |
|----------|------------------------------------------------|-----------------------------------------------|-------------------------------|----------------------|------------------------|
| 1        | [RhCp*Cl <sub>2</sub> ] <sub>2</sub> (2.5)     | Cu(OAc) <sub>2</sub> ·H <sub>2</sub> O (2)    | AgSbF <sub>6</sub> (10)       | DCE                  | 62                     |
| 2        | [RhCp*Cl <sub>2</sub> ] <sub>2</sub> (2.5)     | Cu(OAc) <sub>2</sub> (2)                      | AgSbF <sub>6</sub> (10)       | DCE                  | 60                     |
| 3        | [RhCp*Cl <sub>2</sub> ] <sub>2</sub> (2.5)     | Ag <sub>2</sub> CO <sub>3</sub> (2)           | AgSbF <sub>6</sub> (10)       | DCE                  | 15                     |
| 4        | [RhCp*Cl <sub>2</sub> ] <sub>2</sub> (2.5)     | AgOAc (2)                                     | AgSbF <sub>6</sub> (10)       | DCE                  | trace                  |
| 5        | [RhCp*Cl <sub>2</sub> ] <sub>2</sub> (2.5)     | Cu(OAc) <sub>2</sub> ·H <sub>2</sub> O (2)    | AgSbF <sub>6</sub> (10)       | THF                  | 55                     |
| 6        | [RhCp*Cl <sub>2</sub> ] <sub>2</sub> (2.5)     | Cu(OAc) <sub>2</sub> ·H <sub>2</sub> O (2)    | AgSbF <sub>6</sub> (10)       | CH <sub>3</sub> CN   | 37                     |
| 7        | [RhCp*Cl <sub>2</sub> ] <sub>2</sub> (2.5)     | Cu(OAc) <sub>2</sub> ·H <sub>2</sub> O (2)    | AgSbF <sub>6</sub> (10)       | dioxane              | 48                     |
| 8        | [RhCp*Cl <sub>2</sub> ] <sub>2</sub> (2.5)     | Cu(OAc) <sub>2</sub> ·H <sub>2</sub> O (2)    | AgSbF <sub>6</sub> (10)       | <i>t</i> -BuOH       | 70                     |
| <b>9</b> | <b>[RhCp*Cl<sub>2</sub>]<sub>2</sub> (2.5)</b> | <b>Cu(OAc)<sub>2</sub>·H<sub>2</sub>O (2)</b> | <b>AgSbF<sub>6</sub> (10)</b> | <b><i>t</i>-AmOH</b> | <b>78</b>              |
| 10       | [RhCp*Cl <sub>2</sub> ] <sub>2</sub> (2.5)     |                                               | AgSbF <sub>6</sub> (10)       | <i>t</i> -AmOH       | trace                  |
| 11       | [RhCp*Cl <sub>2</sub> ] <sub>2</sub> (2.5)     | Cu(OAc) <sub>2</sub> ·H <sub>2</sub> O (2)    |                               | <i>t</i> -AmOH       | 65                     |
| 12       | [RhCp*Cl <sub>2</sub> ] <sub>2</sub> (2.5)     | Cu(OAc) <sub>2</sub> ·H <sub>2</sub> O (0.2)  | AgSbF <sub>6</sub> (10)       | <i>t</i> -AmOH       | 10                     |
| 13       | [RhCp*Cl <sub>2</sub> ] <sub>2</sub> (5)       | Cu(OAc) <sub>2</sub> ·H <sub>2</sub> O (2)    | AgSbF <sub>6</sub> (20)       | <i>t</i> -AmOH       | 80                     |

## Characterization data for starting materials (1a, 1f–1r and 5a)

### *N-p-Tolyl-1H-indole-1-carboxamide (1a)*

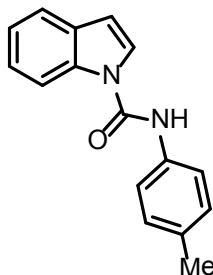

$^1\text{H}$  NMR (700 MHz,  $\text{CDCl}_3$ )  $\delta$  8.16 (d,  $J = 8.3$  Hz, 1H), 7.68 (d,  $J = 7.7$  Hz, 1H), 7.61–7.59 (m, 1H), 7.47–7.44 (m, 2H), 7.41–7.38 (m, 1H), 7.35 (br s, 1H), 7.32–7.30 (m, 1H), 7.25–7.22 (m, 2H), 6.73–6.71 (m, 1H), 2.40 (s, 3H);  $^{13}\text{C}$  NMR (175 MHz,  $\text{CDCl}_3$ )  $\delta$  149.9, 135.3, 134.8, 134.5, 130.5, 129.9, 124.6, 124.3, 122.7, 121.6, 120.8, 114.2, 107.7, 21.0; IR (KBr)  $\nu$  3247, 3148, 3050, 2858, 1672, 1596, 1529, 1448, 1330, 1251, 1202, 1086, 1013, 812, 741  $\text{cm}^{-1}$ ; HRMS (EI) calcd for  $\text{C}_{16}\text{H}_{14}\text{N}_2\text{O}$   $[\text{M}]^+$  250.1106, found 250.1107.

### 4-Methoxy-*N-p*-tolyl-1H-indole-1-carboxamide (1f)

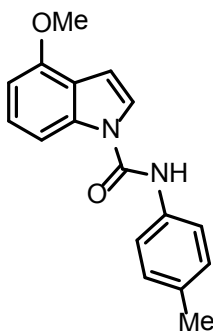

$^1\text{H}$  NMR (700 MHz,  $\text{CDCl}_3$ )  $\delta$  7.64 (d,  $J = 8.4$  Hz, 1H), 7.41 (d,  $J = 3.5$  Hz, 1H), 7.36 (d,  $J = 8.4$  Hz, 2H), 7.33 (br s, 1H), 7.22 (d,  $J = 8.3$  Hz, 1H), 7.13 (d,  $J = 8.0$  Hz, 2H), 6.74 (d,  $J = 3.6$  Hz, 1H), 6.64 (d,  $J = 7.8$  Hz, 1H), 3.92 (s, 3H), 2.30 (s, 3H);  $^{13}\text{C}$  NMR (175 MHz,  $\text{CDCl}_3$ )  $\delta$  153.5, 149.9, 136.4, 134.7, 134.6, 129.9, 125.6, 122.9, 120.9, 120.7, 107.1, 104.7, 102.9, 55.6, 21.0; IR (KBr)  $\nu$  3317, 3121, 3036, 2937, 1677, 1588, 1517, 1490, 1432, 1327, 1260, 1221, 1065, 1023, 808, 739  $\text{cm}^{-1}$ ; HRMS (EI) calcd for  $\text{C}_{17}\text{H}_{16}\text{N}_2\text{O}_2$   $[\text{M}]^+$  280.1212, found 280.1209.

#### 4-Nitro-*N-p*-tolyl-1H-indole-1-carboxamide (1g)

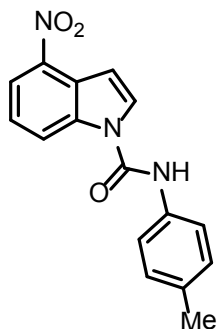

$^1\text{H}$  NMR (700 MHz,  $\text{CDCl}_3$ )  $\delta$  8.59 (d,  $J = 8.2$  Hz, 1H), 8.21 (d,  $J = 8.0$  Hz, 1H), 7.69 (d,  $J = 3.6$  Hz, 1H), 7.46 (d,  $J = 3.5$  Hz, 1H), 7.43 (t,  $J = 8.1$  Hz, 1H), 7.39 (d,  $J = 8.3$  Hz, 2H), 7.25 (br s, 1H), 7.20 (d,  $J = 8.1$  Hz, 2H), 2.35 (s, 3H);  $^{13}\text{C}$  NMR (175 MHz,  $\text{CDCl}_3$ )  $\delta$  149.1, 140.8, 137.6, 135.5, 133.9, 130.1, 127.2, 124.5, 124.1, 121.6, 121.0, 119.9, 107.5, 21.1; IR (KBr)  $\nu$  3413, 3291, 3126, 3027, 2917, 1715, 1687, 1597, 1530, 1406, 1325, 1194, 1112, 875, 740  $\text{cm}^{-1}$ ; HRMS (EI) calcd for  $\text{C}_{16}\text{H}_{13}\text{N}_3\text{O}_3$   $[\text{M}]^+$  295.0957, found 295.0960.

#### 4-Cyano-*N-p*-tolyl-1H-indole-1-carboxamide (1h)

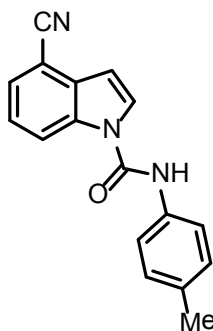

$^1\text{H}$  NMR (700 MHz,  $\text{CDCl}_3$ )  $\delta$  8.45 (d,  $J = 8.4$  Hz, 1H), 7.65 (d,  $J = 3.6$  Hz, 1H), 7.58 (d,  $J = 7.5$  Hz, 1H), 7.40–7.38 (m, 3H), 7.22–7.19 (m, 3H), 6.91 (d,  $J = 3.6$  Hz, 1H), 2.35 (s, 3H);  $^{13}\text{C}$  NMR (175 MHz,  $\text{CDCl}_3$ )  $\delta$  149.1, 135.4, 134.0, 131.7, 130.1, 128.2, 127.6, 126.0, 124.6, 121.0, 119.7, 118.0, 106.3, 104.2, 21.1; IR (KBr)  $\nu$  3298, 3120, 3020, 2918, 1685, 1596,

1520, 1411, 1320, 1180, 870, 740  $\text{cm}^{-1}$ ; HRMS (EI) calcd for  $\text{C}_{17}\text{H}_{13}\text{N}_3\text{O}$   $[\text{M}]^+$  275.1059, found 275.1054.

### 5-Methoxy-*N-p*-tolyl-1H-indole-1-carboxamide (1i)

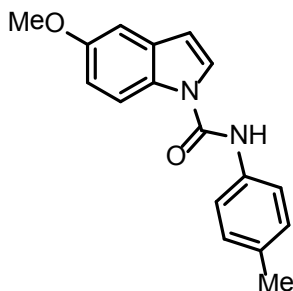

$^1\text{H}$  NMR (700 MHz,  $\text{CDCl}_3$ )  $\delta$  7.99 (d,  $J = 9.0$  Hz, 1H), 7.50 (d,  $J = 3.5$  Hz, 1H), 7.39 (d,  $J = 8.4$  Hz, 2H), 7.18–7.17 (m, 3H), 7.06 (d,  $J = 2.4$  Hz, 1H), 6.95 (dd,  $J = 8.9, 2.4$  Hz, 1H), 6.59 (d,  $J = 3.5$  Hz, 1H), 3.85 (s, 3H), 2.33 (s, 3H);  $^{13}\text{C}$  NMR (175 MHz,  $\text{CDCl}_3$ )  $\delta$  156.0, 149.7, 134.7, 134.6, 131.3, 130.2, 130.0, 124.7, 120.7, 115.0, 113.7, 107.7, 103.8, 55.8, 21.0; IR (KBr)  $\nu$  3413, 3291, 3126, 3027, 2917, 1715, 1687, 1597, 1530, 1406, 1325, 1194, 1112, 875, 740  $\text{cm}^{-1}$ ; HRMS (EI) calcd for  $\text{C}_{17}\text{H}_{16}\text{N}_2\text{O}_2$   $[\text{M}]^+$  280.1212, found 280.1212.

### 5-Chloro-*N-p*-tolyl-1H-indole-1-carboxamide (1j)

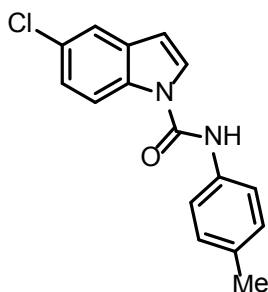

$^1\text{H}$  NMR (700 MHz,  $\text{CDCl}_3$ )  $\delta$  8.08 (d,  $J = 8.8$  Hz, 1H), 7.57 (d,  $J = 2.0$  Hz, 1H), 7.51 (d,  $J = 3.6$  Hz, 1H), 7.37 (d,  $J = 8.4$  Hz, 2H), 7.28 (dd,  $J = 8.8, 2.0$  Hz, 1H), 7.18–7.17 (m, 3H), 6.61 (d,  $J = 3.5$  Hz, 1H), 2.33 (s, 3H);  $^{13}\text{C}$  NMR (175 MHz,  $\text{CDCl}_3$ )  $\delta$  149.5, 135.0, 134.3, 134.0, 131.4, 130.0, 128.5, 125.0, 124.9, 121.0, 120.9, 115.6, 107.3, 21.1; IR (KBr)  $\nu$  3288, 3181, 3027,

2917, 1669, 1595, 1527, 1447, 1333, 1266, 1249, 1200, 1022, 802  $\text{cm}^{-1}$ ; HRMS (EI) calcd for  $\text{C}_{16}\text{H}_{13}\text{ClN}_2\text{O}$   $[\text{M}]^+$  284.0716, found 284.0712.

### 5-Bromo-*N-p*-tolyl-1H-indole-1-carboxamide (1k)

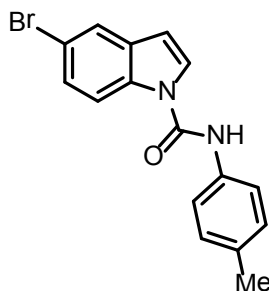

$^1\text{H}$  NMR (700 MHz,  $\text{CDCl}_3$ )  $\delta$  8.02 (d,  $J = 8.7$  Hz, 1H), 7.72 (s, 1H), 7.48 (d,  $J = 3.5$  Hz, 1H), 7.40 (dd,  $J = 8.7, 1.8$  Hz, 1H), 7.36 (d,  $J = 8.3$  Hz, 2H), 7.22 (br s, 1H), 7.16 (d,  $J = 8.2$  Hz, 2H), 6.58 (d,  $J = 3.5$  Hz, 1H), 2.32 (s, 3H);  $^{13}\text{C}$  NMR (175 MHz,  $\text{CDCl}_3$ )  $\delta$  149.5, 135.1, 134.4, 134.32, 134.30, 132.0, 130.0, 127.5, 124.9, 124.0, 120.9, 116.1, 116.0, 107.2, 21.1; IR (KBr)  $\nu$  3295, 3114, 3038, 2920, 1675, 1598, 1517, 1445, 1406, 1328, 1266, 1197, 1023, 804, 740  $\text{cm}^{-1}$ ; HRMS (EI) calcd for  $\text{C}_{16}\text{H}_{13}\text{BrN}_2\text{O}$   $[\text{M}]^+$  328.0211, found 328.0211.

### 6-Fluoro-*N-p*-tolyl-1H-indole-1-carboxamide (1l)

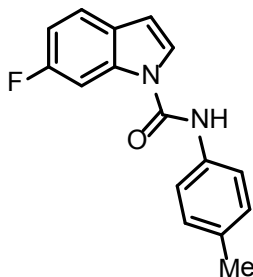

$^1\text{H}$  NMR (700 MHz,  $\text{CDCl}_3$ )  $\delta$  7.92 (dd,  $J = 10.2, 2.2$  Hz, 1H), 7.51 (dd,  $J = 8.6, 5.3$  Hz, 1H), 7.45 (d,  $J = 3.6$  Hz, 1H), 7.38 (d,  $J = 8.3$  Hz, 2H), 7.18–7.16 (m, 3H), 6.99 (dt,  $J = 8.7, 2.2$  Hz, 1H), 6.64 (d,  $J = 3.5$  Hz, 1H), 2.33 (s, 3H);  $^{13}\text{C}$  NMR (175 MHz,  $\text{CDCl}_3$ )  $\delta$  161.2 (d,  $J_{\text{C-F}} = 239.1$  Hz), 149.6, 135.8, 135.0, 134.6, 130.0, 126.5, 123.9 (d,  $J_{\text{C-F}} = 4.0$  Hz), 122.0 (d,  $J_{\text{C-F}} = 9.4$  Hz), 120.9, 111.3 (d,  $J_{\text{C-F}} = 24.2$  Hz), 107.9, 102.1 (d,  $J_{\text{C-F}} = 28.4$  Hz), 21.1; IR (KBr)  $\nu$  3293,



3120, 3034, 2923, 1671, 1596, 1521, 1477, 1440, 1332, 1257, 1210, 1114, 943, 800  $\text{cm}^{-1}$ ; HRMS (EI) calcd for  $\text{C}_{16}\text{H}_{13}\text{FN}_2\text{O}$   $[\text{M}]^+$  268.1012, found 268.1016.

### 6-Chloro-*N-p*-tolyl-1H-indole-1-carboxamide (1m)

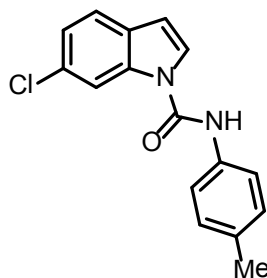

$^1\text{H}$  NMR (700 MHz,  $\text{CDCl}_3$ )  $\delta$  8.19 (s, 1H), 7.49–7.44 (m, 2H), 7.37–7.34 (m, 2H), 7.27–7.20 (m, 2H), 7.19–7.14 (m, 2H), 6.62–6.60 (m, 1H), 2.32 (s, 3H);  $^{13}\text{C}$  NMR (175 MHz,  $\text{CDCl}_3$ )  $\delta$  149.5, 135.9, 135.1, 134.2, 130.7, 129.9, 128.7, 124.3, 123.4, 122.0, 120.9, 115.0, 107.8, 21.1; IR (KBr)  $\nu$  3273, 3113, 3032, 2920, 1672, 1597, 1517, 1434, 1328, 1249, 1200, 1122, 805  $\text{cm}^{-1}$ ; HRMS (EI) calcd for  $\text{C}_{16}\text{H}_{13}\text{ClN}_2\text{O}$   $[\text{M}]^+$  284.0716, found 284.0714.

### 7-Methyl-*N-p*-tolyl-1H-indole-1-carboxamide (1n)

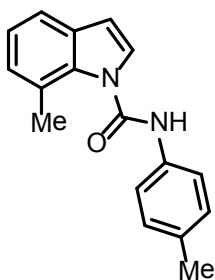

$^1\text{H}$  NMR (700 MHz,  $\text{CDCl}_3$ )  $\delta$  7.46 (d,  $J = 7.7$  Hz, 1H), 7.41–7.38 (m, 3H), 7.23 (br s, 1H), 7.17–7.15 (m, 3H), 7.10 (d,  $J = 7.2$  Hz, 1H), 6.59 (s, 1H), 2.51 (s, 3H), 2.33 (s, 3H);  $^{13}\text{C}$  NMR (175 MHz,  $\text{CDCl}_3$ )  $\delta$  150.0, 134.8, 134.6, 134.5, 131.4, 130.0, 127.2, 127.0, 123.8, 122.9, 119.9, 119.2, 106.9, 21.0, 20.6; IR (KBr)  $\nu$  3273, 3126, 3046, 2921, 1681, 1600, 1520, 1407, 1321, 1206, 1078  $\text{cm}^{-1}$ ; HRMS (EI) calcd for  $\text{C}_{17}\text{H}_{16}\text{N}_2\text{O}$   $[\text{M}]^+$  264.1263, found 264.1267.

### 3-Methyl-*N*-*p*-tolyl-1H-indole-1-carboxamide (1o)

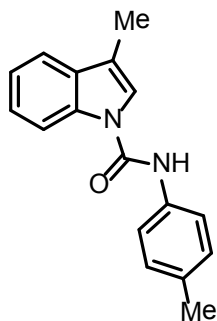

$^1\text{H}$  NMR (700 MHz,  $\text{CDCl}_3$ )  $\delta$  8.10 (d,  $J = 8.2$  Hz, 1H), 7.54 (d,  $J = 7.7$  Hz, 1H), 7.38 (d,  $J = 6.7$  Hz, 2H), 7.33 (t,  $J = 7.7$  Hz, 1H), 7.28–7.24 (m, 2H), 7.21–7.16 (m, 3H), 2.32 (s, 3H), 2.29 (s, 3H);  $^{13}\text{C}$  NMR (175 MHz,  $\text{CDCl}_3$ )  $\delta$  149.6, 135.5, 134.6, 134.3, 131.1, 129.7, 124.5, 122.2, 120.9, 120.5, 119.3, 117.0, 114.2, 20.8, 9.6; IR (KBr)  $\nu$  3215, 3104, 3030, 2918, 1658, 1594, 1520, 1447, 1345, 1252, 1215, 1085, 737  $\text{cm}^{-1}$ ; HRMS (EI) calcd for  $\text{C}_{17}\text{H}_{16}\text{N}_2\text{O}$   $[\text{M}]^+$  264.1263, found 264.1265.

### Methyl 1-(*p*-tolylcarbonyl)-1H-indole-3-carboxylate (1p)

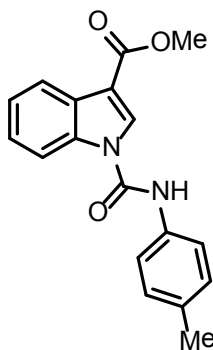

$^1\text{H}$  NMR (700 MHz,  $\text{CDCl}_3$ )  $\delta$  8.25 (s, 1H), 8.13 (d,  $J = 8.2$  Hz, 1H), 8.06 (d,  $J = 8.1$  Hz, 1H), 7.69 (s, 1H), 7.43 (d,  $J = 8.3$  Hz, 2H), 7.37–7.31 (m, 2H), 7.19 (d,  $J = 8.0$  Hz, 2H), 3.89 (s, 3H), 2.34 (s, 3H);  $^{13}\text{C}$  NMR (175 MHz,  $\text{CDCl}_3$ )  $\delta$  165.0, 149.0, 135.7, 135.3, 134.1, 130.6, 130.0, 127.4, 125.4, 124.1, 122.1, 120.8, 114.3, 112.2, 51.8, 21.1; IR (KBr)  $\nu$  3304, 3132, 3054, 2921, 1681, 1600, 1517, 1449, 1316, 1194, 1112, 735  $\text{cm}^{-1}$ ; HRMS (EI) calcd for  $\text{C}_{18}\text{H}_{16}\text{N}_2\text{O}_3$   $[\text{M}]^+$  308.1161, found 308.1161.

### 2-Methyl-*N-p*-tolyl-1H-indole-1-carboxamide (1q)

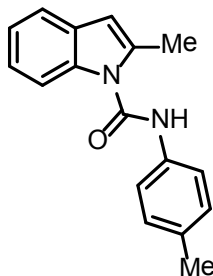

$^1\text{H}$  NMR (700 MHz,  $\text{CDCl}_3$ )  $\delta$  7.63 (d,  $J = 8.6$  Hz, 1H), 7.49 (d,  $J = 8.0$  Hz, 1H), 7.42 (m, 3H), 7.21–7.15 (m, 4H), 6.33 (s, 1H), 2.58 (s, 3H), 2.35 (s, 3H);  $^{13}\text{C}$  NMR (175 MHz,  $\text{CDCl}_3$ )  $\delta$  149.8, 137.4, 135.5, 134.7, 134.6, 130.0, 129.6, 122.9, 122.2, 120.6, 120.0, 111.8, 106.3, 21.0, 15.0; IR (KBr)  $\nu$  3247, 3149, 2858, 1672, 1596, 1529, 1448, 1330, 1251, 1087, 1013, 814  $\text{cm}^{-1}$ ; HRMS (EI) calcd for  $\text{C}_{17}\text{H}_{16}\text{N}_2\text{O}$   $[\text{M}]^+$  264.1263, found 264.1260.

### *N-p*-Tolyl-9H-carbazole-9-carboxamide (1r)

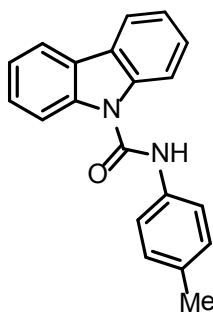

$^1\text{H}$  NMR (700 MHz,  $\text{CDCl}_3$ )  $\delta$  8.04 (d,  $J = 8.9$  Hz, 4H), 7.49–7.45 (m, 4H), 7.43 (br s, 1H), 7.36–7.34 (m, 2H), 7.21 (d,  $J = 8.0$  Hz, 2H), 2.35 (s, 3H);  $^{13}\text{C}$  NMR (175 MHz,  $\text{CDCl}_3$ )  $\delta$  150.3, 138.4, 134.7, 134.6, 130.0, 127.3, 125.4, 122.8, 120.5, 120.3, 113.7, 21.1; IR (KBr)  $\nu$  3216, 3104, 3029, 2917, 1658, 1594, 1520, 1448, 1346, 1251, 1214, 1084  $\text{cm}^{-1}$ ; HRMS (EI) calcd for  $\text{C}_{20}\text{H}_{16}\text{N}_2\text{O}$   $[\text{M}]^+$  300.1263, found 300.1264.

### *N-p*-Tolyl-1H-pyrrole-1-carboxamide (5a)

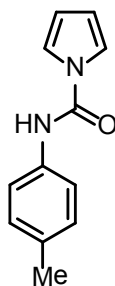

$^1\text{H}$  NMR (700 MHz,  $\text{CDCl}_3$ )  $\delta$  7.35 (d,  $J = 8.4$  Hz, 2H), 7.27–7.24 (m, 2H), 7.21 (br s, 1H), 7.15 (d,  $J = 8.1$  Hz, 2H), 6.31–6.30 (m, 2H), 2.32 (s, 3H);  $^{13}\text{C}$  NMR (175 MHz,  $\text{CDCl}_3$ )  $\delta$  148.7, 134.9, 134.3, 129.9, 120.8, 118.7, 112.6, 21.0; IR (KBr)  $\nu$  3243, 3146, 2860, 1672, 1597, 1449, 1331, 1250, 1086, 1013, 814  $\text{cm}^{-1}$ ; HRMS (EI) calcd for  $\text{C}_{12}\text{H}_{12}\text{N}_2\text{O}$   $[\text{M}]^+$  200.0950, found 200.0948.

## Characterization data for products (3a, 3f–3p, 4b–4l and 6a–c)

### (*E*)-Ethyl 3-(1*H*-indol-2-yl)acrylate (3a)

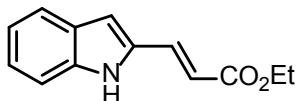

$^1\text{H}$  NMR (700 MHz,  $\text{CDCl}_3$ )  $\delta$  8.60 (br s, 1H), 7.68 (d,  $J = 16.0$  Hz, 1H), 7.60 (d,  $J = 7.8$  Hz, 1H), 7.34 (d,  $J = 8.1$  Hz, 1H), 7.25–7.23 (m, 1H), 7.10 (t,  $J = 7.8$  Hz, 1H), 6.79 (s, 1H), 6.25 (d,  $J = 16.0$  Hz, 1H), 4.28 (q,  $J = 7.1$  Hz, 2H), 1.33 (t,  $J = 7.1$  Hz, 3H);  $^{13}\text{C}$  NMR (175 MHz,  $\text{CDCl}_3$ )  $\delta$  167.0, 137.7, 134.4, 133.3, 128.3, 124.6, 121.5, 120.5, 115.5, 111.1, 108.9, 60.6, 14.3; IR (KBr)  $\nu$  3312, 2981, 1682, 1627, 1611, 1580, 1424, 1368, 1278, 1237, 1178, 1124, 1040, 963, 928, 861, 798  $\text{cm}^{-1}$ ; HRMS (EI) calcd for  $\text{C}_{13}\text{H}_{13}\text{NO}_2$   $[\text{M}]^+$  215.0946, found 215.0944.

### (*E*)-Ethyl 3-(4-methoxy-1*H*-indol-2-yl)acrylate (3f)

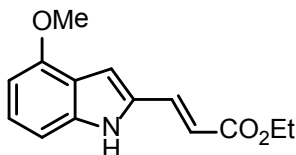

$^1\text{H}$  NMR (700 MHz,  $\text{DMSO-d}_6$ )  $\delta$  7.60 (d,  $J = 15.9$  Hz, 1H), 7.11 (t,  $J = 7.9$  Hz, 1H), 6.96 (d,  $J = 8.2$  Hz, 1H), 6.91 (s, 1H), 6.50–6.48 (m, 2H), 4.18 (q,  $J = 7.1$  Hz, 2H), 3.86 (s, 3H), 1.25 (t,  $J = 7.1$  Hz, 3H);  $^{13}\text{C}$  NMR (175 MHz,  $\text{DMSO-d}_6$ )  $\delta$  166.4, 153.3, 139.3, 134.7, 132.3, 125.2, 118.8, 114.8, 106.1, 104.6, 99.4, 59.8, 54.9, 14.2; IR (KBr)  $\nu$  3311, 2924, 1683, 1608, 1587, 1511, 1462, 1365, 1315, 1249, 1161, 1133, 1095, 1033, 972, 769  $\text{cm}^{-1}$ ; HRMS (EI) calcd for  $\text{C}_{14}\text{H}_{15}\text{NO}_3$   $[\text{M}]^+$  245.1052, found 245.1049.

### (*E*)-Ethyl 3-(4-nitro-1*H*-indol-2-yl)acrylate (3g)

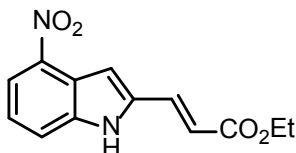

$^1\text{H}$  NMR (700 MHz, DMSO- $d_6$ )  $\delta$  12.40 (br s, 1H), 8.07 (d,  $J = 7.9$  Hz, 1H), 7.87 (d,  $J = 7.9$  Hz, 1H), 7.73 (d,  $J = 16.1$  Hz, 1H), 7.48 (s, 1H), 7.40 (t,  $J = 7.9$  Hz, 1H), 6.73 (d,  $J = 16.1$  Hz, 1H), 4.22 (q,  $J = 7.1$  Hz, 2H), 1.27 (t,  $J = 7.0$  Hz, 3H);  $^{13}\text{C}$  NMR (175 MHz, DMSO- $d_6$ )  $\delta$  165.8, 139.7, 139.6, 138.0, 133.6, 122.8, 121.3, 119.3, 119.1, 117.6, 106.7, 60.2, 14.1; IR (KBr)  $\nu$  3299, 2981, 2927, 1988, 1689, 1638, 1507, 1488, 1343, 1325, 1276, 1237, 1179, 1136, 1036, 991, 795  $\text{cm}^{-1}$ ; HRMS (EI) calcd for  $\text{C}_{13}\text{H}_{12}\text{N}_2\text{O}_4$   $[\text{M}]^+$  260.0797, found 260.0789.

**(E)-Ethyl 3-(4-cyano-1H-indol-2-yl)acrylate (3h)**

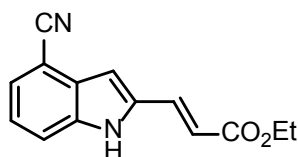

$^1\text{H}$  NMR (700 MHz,  $\text{CDCl}_3$ )  $\delta$  8.93 (br s, 1H), 7.68 (d,  $J = 16.0$  Hz, 1H), 7.58 (dt,  $J = 8.3$ , 0.8 Hz, 1H), 7.46 (dd,  $J = 7.3$ , 0.8 Hz, 1H), 7.28–7.26 (m, 1H), 6.99 (s, 1H), 6.38 (d,  $J = 16.0$  Hz, 1H), 4.30 (q,  $J = 7.1$  Hz, 2H), 1.34 (t,  $J = 7.1$  Hz, 3H);  $^{13}\text{C}$  NMR (175 MHz,  $\text{CDCl}_3$ )  $\delta$  166.4, 137.1, 135.6, 133.3, 129.5, 126.1, 123.8, 118.5, 118.1, 115.8, 106.2, 103.8, 60.9, 14.2; IR (KBr)  $\nu$  3307, 2980, 2217, 1690, 1633, 1520, 1432, 1367, 1345, 1276, 1176, 1141, 1032, 968, 859, 780  $\text{cm}^{-1}$ ; HRMS (EI) calcd for  $\text{C}_{14}\text{H}_{12}\text{N}_2\text{O}_2$   $[\text{M}]^+$  240.0899, found 240.0894.

**(E)-Ethyl 3-(5-methoxy-1H-indol-2-yl)acrylate (3i)**

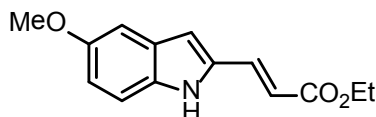

$^1\text{H}$  NMR (700 MHz,  $\text{CDCl}_3$ )  $\delta$  8.58 (br s, 1H), 7.64 (d,  $J = 15.9$  Hz, 1H), 7.22 (d,  $J = 8.8$  Hz, 1H), 7.01 (s, 1H), 6.91 (d,  $J = 8.8$  Hz, 1H), 6.72 (s, 1H), 6.23 (d,  $J = 15.9$  Hz, 1H), 4.26 (q,  $J = 7.1$  Hz, 2H), 3.82 (s, 3H), 1.32 (t,  $J = 7.0$  Hz, 3H);  $^{13}\text{C}$  NMR (175 MHz,  $\text{CDCl}_3$ )  $\delta$  167.1, 155.5, 134.4, 133.9, 133.0, 128.7, 115.5, 115.1, 112.0, 108.3, 102.1, 60.6, 55.6, 14.3; IR (KBr)  $\nu$  3332, 2934, 1686, 1619, 1520, 1454, 1368, 1264, 1162, 1122, 1030, 970, 839, 972  $\text{cm}^{-1}$ ; HRMS (EI) calcd for  $\text{C}_{14}\text{H}_{15}\text{NO}_3$   $[\text{M}]^+$  245.1052, found 245.1053.

**(E)-Ethyl 3-(5-chloro-1H-indol-2-yl)acrylate (3j)**

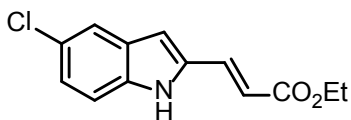

$^1\text{H}$  NMR (700 MHz, DMSO- $d_6$ )  $\delta$  11.76 (br s, 1H), 7.63–7.61 (m, 2H), 7.38 (d,  $J$  = 8.6 Hz, 1H), 7.18 (dd,  $J$  = 8.6, 2.1 Hz, 1H), 6.88 (s, 1H), 6.57 (d,  $J$  = 15.9 Hz, 1H), 4.19 (q,  $J$  = 7.0 Hz, 2H), 1.26 (t,  $J$  = 7.0 Hz, 3H);  $^{13}\text{C}$  NMR (175 MHz, DMSO- $d_6$ )  $\delta$  166.1, 136.3, 135.2, 134.3, 128.8, 124.2, 123.8, 120.1, 116.7, 113.0, 107.5, 60.0, 14.2; IR (KBr)  $\nu$  3329, 2923, 2852, 1690, 1628, 1613, 1519, 1467, 1310, 1272, 1187, 1126, 1030, 967, 864, 795  $\text{cm}^{-1}$ ; HRMS (EI) calcd for  $\text{C}_{13}\text{H}_{12}\text{ClNO}_2$   $[\text{M}]^+$  249.0557, found 249.0542.

**(E)-Ethyl 3-(5-bromo-1H-indol-2-yl)acrylate (3k)**

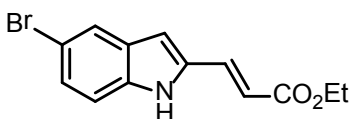

$^1\text{H}$  NMR (700 MHz, DMSO- $d_6$ )  $\delta$  11.77 (s, 1H), 7.76 (d,  $J$  = 1.8 Hz, 1H), 7.62 (d,  $J$  = 15.9 Hz, 1H), 7.34 (d,  $J$  = 8.6 Hz, 1H), 7.21 (dd,  $J$  = 8.6, 1.9 Hz, 1H), 6.88 (s, 1H), 6.57 (d,  $J$  = 15.9 Hz, 1H), 4.19 (q,  $J$  = 7.0 Hz, 2H), 1.26 (t,  $J$  = 7.1 Hz, 3H);  $^{13}\text{C}$  NMR (175 MHz, DMSO- $d_6$ )  $\delta$  166.1, 136.5, 135.0, 134.2, 129.6, 126.2, 123.1, 116.7, 113.4, 112.1, 107.4, 60.0, 14.1; IR (KBr)  $\nu$  3312, 2924, 1686, 1624, 1569, 1416, 1310, 1281, 1182, 1125, 1030, 967, 854, 794  $\text{cm}^{-1}$ ; HRMS (EI) calcd for  $\text{C}_{13}\text{H}_{12}\text{BrNO}_2$   $[\text{M}]^+$  293.0051, found 293.0052.

**(E)-Ethyl 3-(6-fluoro-1H-indol-2-yl)acrylate (3l)**

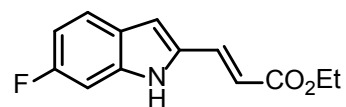

$^1\text{H}$  NMR (700 MHz,  $\text{CDCl}_3$ )  $\delta$  8.84 (br s, 1H), 7.64 (d,  $J$  = 15.9 Hz, 1H), 7.51–7.49 (m, 1H), 7.02 (d,  $J$  = 9.3 Hz, 1H), 6.86 (t,  $J$  = 9.5 Hz, 1H), 6.75 (s, 1H), 6.25 (d,  $J$  = 15.9 Hz, 1H), 4.28 (q,  $J$  = 7.1 Hz, 2H), 1.33 (t,  $J$  = 7.0 Hz, 3H);  $^{13}\text{C}$  NMR (175 MHz,  $\text{CDCl}_3$ )  $\delta$  167.1, 161.2

(d,  $J_{C-F} = 240.8$  Hz), 138.0 (d,  $J_{C-F} = 12.3$  Hz), 134.1, 133.9 (d,  $J_{C-F} = 3.0$  Hz), 124.9, 122.5 (d,  $J_{C-F} = 10.4$  Hz), 115.2, 109.7 (d,  $J_{C-F} = 24.6$  Hz), 108.9, 97.4 (d,  $J_{C-F} = 26.8$  Hz), 60.7, 14.3; IR (KBr)  $\nu$  3313, 2923, 1685, 1613, 1503, 1446, 1366, 1264, 1235, 1137, 1104, 1037, 970, 812, 730  $\text{cm}^{-1}$ ; HRMS (EI) calcd for  $\text{C}_{13}\text{H}_{12}\text{FNO}_2$   $[\text{M}]^+$  233.0852, found 233.0845.

**(E)-Ethyl 3-(6-chloro-1H-indol-2-yl)acrylate (3m)**

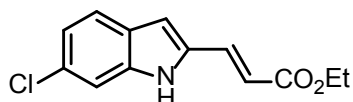

$^1\text{H}$  NMR (700 MHz,  $\text{CDCl}_3$ )  $\delta$  8.76 (br s, 1H), 7.64 (d,  $J = 16.0$  Hz, 1H), 7.49 (d,  $J = 8.4$  Hz, 1H), 7.33 (s, 1H), 7.06 (dd,  $J = 8.4, 1.7$  Hz, 1H), 6.75 (s, 1H), 6.27 (d,  $J = 16.0$  Hz, 1H), 4.28 (q,  $J = 7.0$  Hz, 2H), 1.34 (t,  $J = 7.1$  Hz, 3H);  $^{13}\text{C}$  NMR (175 MHz,  $\text{CDCl}_3$ )  $\delta$  167.2, 138.3, 134.3, 134.2, 130.5, 127.1, 122.5, 121.6, 116.3, 111.2, 108.8, 61.0, 14.5; IR (KBr)  $\nu$  3319, 2923, 1683, 1607, 1573, 1444, 1367, 1281, 1131, 1041, 966, 922, 816  $\text{cm}^{-1}$ ; HRMS (EI) calcd for  $\text{C}_{13}\text{H}_{12}\text{ClNO}_2$   $[\text{M}]^+$  249.0557, found 249.0554.

**(E)-Ethyl 3-(7-methyl-1H-indol-2-yl)acrylate (3n)**

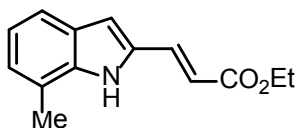

$^1\text{H}$  NMR (700 MHz,  $\text{CDCl}_3$ )  $\delta$  8.39 (br s, 1H), 7.68 (d,  $J = 16.0$  Hz, 1H), 7.45 (d,  $J = 7.6$  Hz, 1H), 7.05–7.01 (m, 2H), 6.80 (s, 1H), 6.30 (d,  $J = 16.0$  Hz, 1H), 4.27 (q,  $J = 7.1$  Hz, 2H), 2.50 (s, 3H), 1.33 (t,  $J = 7.1$  Hz, 3H);  $^{13}\text{C}$  NMR (175 MHz,  $\text{CDCl}_3$ )  $\delta$  167.2, 137.6, 134.7, 133.3, 128.2, 125.2, 121.0, 120.6, 119.4, 115.5, 109.7, 60.8, 16.8, 14.5; IR (KBr)  $\nu$  3339, 2924, 2854, 1692, 1632, 1516, 1461, 1369, 1264, 1178, 1041, 972, 806, 735  $\text{cm}^{-1}$ ; HRMS (EI) calcd for  $\text{C}_{14}\text{H}_{15}\text{NO}_2$   $[\text{M}]^+$  229.1103, found 229.1099.

**(E)-Ethyl 3-(3-methyl-1H-indol-2-yl)acrylate (3o)**



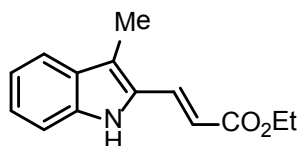

$^1\text{H}$  NMR (700 MHz,  $\text{CDCl}_3$ )  $\delta$  8.15 (br s, 1H), 7.80 (d,  $J = 15.9$  Hz, 1H), 7.56 (d,  $J = 7.9$  Hz, 1H), 7.29 (d,  $J = 8.1$  Hz, 1H), 7.26–7.24 (m, 1H), 7.09 (t,  $J = 7.9$  Hz, 1H), 6.11 (d,  $J = 15.9$  Hz, 1H), 4.27 (q,  $J = 7.1$  Hz, 2H), 2.41 (s, 3H), 1.33 (t,  $J = 7.1$  Hz, 3H);  $^{13}\text{C}$  NMR (175 MHz,  $\text{CDCl}_3$ )  $\delta$  167.2, 137.3, 132.1, 129.9, 129.0, 125.0, 119.9, 119.8, 118.7, 113.7, 110.9, 60.5, 14.3, 8.9; IR (KBr)  $\nu$  3323, 2978, 2924, 1682, 1611, 1531, 1456, 1367, 1294, 1236, 1184, 1040, 960, 851, 739  $\text{cm}^{-1}$ ; HRMS (EI) calcd for  $\text{C}_{14}\text{H}_{15}\text{NO}_2$   $[\text{M}]^+$  229.1103, found 229.1102.

**(E)-Methyl 2-(3-ethoxy-3-oxoprop-1-enyl)-1H-indole-3-carboxylate (3p)**

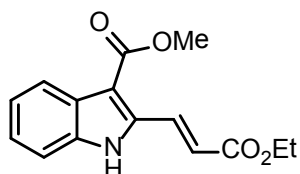

$^1\text{H}$  NMR (700 MHz,  $\text{CDCl}_3$ )  $\delta$  9.26 (br s, 1H), 8.56 (d,  $J = 16.5$  Hz, 1H), 8.16 (d,  $J = 8.1$  Hz, 1H), 7.38 (d,  $J = 8.1$  Hz, 1H), 7.30 (t,  $J = 7.0$  Hz, 1H), 7.24–7.22 (m, 1H), 6.47 (d,  $J = 16.3$  Hz, 1H), 4.31 (q,  $J = 7.1$  Hz, 2H), 3.96 (s, 3H), 1.35 (t,  $J = 7.1$  Hz, 3H);  $^{13}\text{C}$  NMR (175 MHz,  $\text{CDCl}_3$ )  $\delta$  166.7, 165.6, 137.5, 136.5, 133.4, 127.4, 125.5, 122.8, 122.6, 120.1, 111.4, 109.8, 61.3, 51.6, 14.5; IR (KBr)  $\nu$  3295, 2924, 1684, 1516, 1498, 1447, 1368, 1279, 1182, 1080, 1042, 983, 866, 788  $\text{cm}^{-1}$ ; HRMS (EI) calcd for  $\text{C}_{15}\text{H}_{15}\text{NO}_4$   $[\text{M}]^+$  273.1001, found 273.1010.

**(E)-Methyl 3-(5-chloro-1H-indol-2-yl)acrylate (4b)**

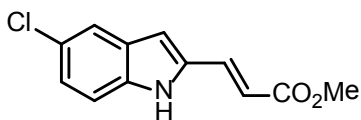

$^1\text{H}$  NMR (700 MHz,  $\text{DMSO-d}_6$ )  $\delta$  11.78 (br s, 1H), 7.65–7.62 (m, 2H), 7.39 (d,  $J = 8.6$  Hz, 1H), 7.17 (dd,  $J = 8.6, 1.9$  Hz, 1H), 6.89 (s, 1H), 6.57 (d,  $J = 16.0$  Hz, 1H), 3.73 (s, 3H);  $^{13}\text{C}$  NMR (175 MHz,  $\text{DMSO-d}_6$ )  $\delta$  166.4, 136.1, 134.9, 134.3, 128.6, 124.0, 123.6, 119.9, 116.0,

112.8, 107.5, 51.3; IR (KBr)  $\nu$  3340, 1693, 1630, 1514, 1436, 1369, 1293, 1273, 1129, 1034, 973, 913, 859, 785  $\text{cm}^{-1}$ ; HRMS (EI) calcd for  $\text{C}_{12}\text{H}_{10}\text{ClNO}_2$   $[\text{M}]^+$  235.0400, found 235.0398.

**(E)-Butyl 3-(5-chloro-1H-indol-2-yl)acrylate (4c)**

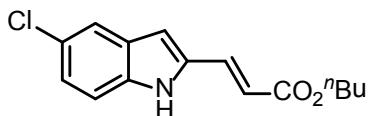

$^1\text{H}$  NMR (700 MHz,  $\text{DMSO-d}_6$ )  $\delta$  11.77 (br s, 1H), 7.63–7.61 (m, 2H), 7.38 (d,  $J = 8.6$  Hz, 1H), 7.18 (dd,  $J = 8.6, 2.1$  Hz, 1H), 6.89 (s, 1H), 6.57 (d,  $J = 16.0$  Hz, 1H), 4.15 (t,  $J = 6.5$  Hz, 2H), 1.64–1.61 (m, 2H), 1.39–1.36 (m, 2H), 0.92 (t,  $J = 7.4$  Hz, 3H);  $^{13}\text{C}$  NMR (175 MHz,  $\text{DMSO-d}_6$ )  $\delta$  165.9, 136.1, 135.0, 134.1, 128.6, 124.0, 123.5, 119.0, 116.4, 112.8, 107.3, 63.5, 30.0, 18.4, 13.3; IR (KBr)  $\nu$  3348, 2939, 2030, 1693, 1631, 1449, 1418, 1309, 1275, 1177, 1129, 1025, 915, 795  $\text{cm}^{-1}$ ; HRMS (EI) calcd for  $\text{C}_{15}\text{H}_{16}\text{ClNO}_2$   $[\text{M}]^+$  277.0870, found 277.0876.

**(E)-tert-Butyl 3-(5-chloro-1H-indol-2-yl)acrylate (4d)**

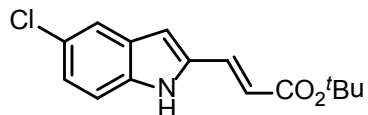

$^1\text{H}$  NMR (700 MHz,  $\text{CDCl}_3$ )  $\delta$  8.68 (br s, 1H), 7.55–7.52 (m, 2H), 7.26 (d,  $J = 8.6$  Hz, 1H), 7.17 (dd,  $J = 8.6, 1.9$  Hz, 1H), 6.69 (s, 1H), 6.23 (d,  $J = 16.0$  Hz, 1H), 1.54 (s, 9H);  $^{13}\text{C}$  NMR (175 MHz,  $\text{CDCl}_3$ )  $\delta$  166.1, 135.9, 134.8, 133.0, 129.4, 126.0, 124.6, 120.6, 118.5, 112.0, 107.4, 80.9, 28.2; IR (KBr)  $\nu$  3318, 2978, 2930, 1681, 1629, 1515, 1475, 1366, 1286, 1156, 1127, 1063, 965, 918, 854, 794  $\text{cm}^{-1}$ ; HRMS (EI) calcd for  $\text{C}_{15}\text{H}_{16}\text{ClNO}_2$   $[\text{M}]^+$  277.0870, found 277.0868.

**(E)-Benzyl 3-(5-chloro-1H-indol-2-yl)acrylate (4e)**

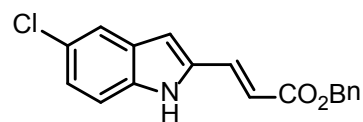

$^1\text{H}$  NMR (700 MHz,  $\text{CDCl}_3$ )  $\delta$  8.47 (br s, 1H), 7.67 (d,  $J = 16.0$  Hz, 1H), 7.55 (d,  $J = 1.8$  Hz, 1H), 7.40–7.32 (m, 5H), 7.25–7.24 (m, 1H), 7.18 (dd,  $J = 8.6, 2.0$  Hz, 1H), 6.72 (s, 1H), 6.29 (d,  $J = 16.0$  Hz, 1H);  $^{13}\text{C}$  NMR (175 MHz,  $\text{CDCl}_3$ )  $\delta$  166.7, 136.2, 136.0, 134.7, 134.6, 129.5, 128.8, 128.5, 128.4, 126.5, 125.2, 121.0, 116.3, 112.4, 108.4, 66.8; IR (KBr)  $\nu$  3325, 2923, 1684, 1630, 1516, 1450, 1373, 1270, 1164, 1125, 1059, 1006, 966, 915, 852, 793  $\text{cm}^{-1}$ ; HRMS (EI) calcd for  $\text{C}_{18}\text{H}_{14}\text{ClNO}_2$   $[\text{M}]^+$  311.0713, found 311.0712.

**(E)-Phenyl 3-(5-chloro-1H-indol-2-yl)acrylate (4f)**

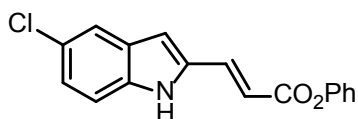

$^1\text{H}$  NMR (700 MHz,  $\text{CDCl}_3$ )  $\delta$  8.53 (br s, 1H), 7.83 (d,  $J = 15.9$  Hz, 1H), 7.58 (s, 1H), 7.41–7.39 (m, 2H), 7.26–7.24 (m, 1H), 7.19–7.15 (m, 3H), 6.81 (s, 1H), 6.43 (d,  $J = 15.9$  Hz, 1H);  $^{13}\text{C}$  NMR (175 MHz,  $\text{CDCl}_3$ )  $\delta$  165.4, 150.9, 136.4, 135.9, 134.5, 129.7, 129.5, 126.6, 126.1, 125.4, 121.8, 121.1, 115.6, 112.5, 108.9; IR (KBr)  $\nu$  3350, 2922, 2853, 2029, 1702, 1631, 1591, 1520, 1491, 1415, 1364, 1305, 1275, 1193, 1139, 1064, 970, 857, 796  $\text{cm}^{-1}$ ; HRMS (EI) calcd for  $\text{C}_{17}\text{H}_{12}\text{ClNO}_2$   $[\text{M}]^+$  297.0557, found 297.0560.

**(E)-3-(5-Chloro-1H-indol-2-yl)-N,N-dimethylacrylamide (4g)**

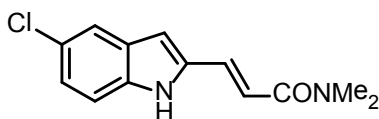

$^1\text{H}$  NMR (700 MHz,  $\text{DMSO-d}_6$ )  $\delta$  11.67 (br s, 1H), 7.59 (d,  $J = 1.9$  Hz, 1H), 7.44 (d,  $J = 15.3$  Hz, 1H), 7.38 (d,  $J = 8.6$  Hz, 1H), 7.20 (d,  $J = 15.4$  Hz, 1H), 7.15 (dd,  $J = 8.6, 2.1$  Hz, 1H), 6.78 (s, 1H), 3.16 (s, 3H), 2.94 (s, 3H);  $^{13}\text{C}$  NMR (175 MHz,  $\text{DMSO-d}_6$ )  $\delta$  165.0, 136.2, 135.7, 130.8, 128.8, 123.7, 122.8, 119.5, 117.1, 112.5, 105.6, 36.5, 35.0; IR (KBr)  $\nu$  3254, 2924, 1624, 1590, 1422, 1398, 1311, 1249, 1151, 1125, 1059, 983, 913, 858, 786  $\text{cm}^{-1}$ ; HRMS (EI) calcd for  $\text{C}_{13}\text{H}_{13}\text{ClNO}_2$   $[\text{M}]^+$  248.0716, found 248.0711.

**(E)-5-Chloro-2-(2-(phenylsulfonyl)vinyl)-1H-indole (4h)**

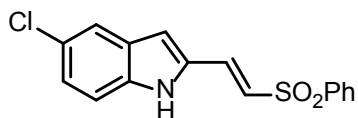

$^1\text{H}$  NMR (700 MHz,  $\text{CDCl}_3$ )  $\delta$  8.92 (br s, 1H), 7.91 (d,  $J = 8.4$  Hz, 2H), 7.65 (d,  $J = 15.3$  Hz, 1H), 7.60–7.58 (m, 1H), 7.54–7.50 (m, 3H), 7.20 (d,  $J = 8.6$  Hz, 1H), 7.16 (dd,  $J = 8.6, 1.9$  Hz, 1H), 6.82 (d,  $J = 15.4$  Hz, 1H), 6.77 (s, 1H);  $^{13}\text{C}$  NMR (175 MHz,  $\text{CDCl}_3$ )  $\delta$  140.5, 136.4, 133.5, 132.3, 132.2, 129.4, 128.9, 127.4, 126.4, 125.5, 124.8, 120.9, 112.5, 109.6; IR (KBr)  $\nu$  3341, 2921, 2852, 1607, 1511, 1445, 1313, 1283, 1141, 1082, 962, 915, 832, 787  $\text{cm}^{-1}$ ; HRMS (EI) calcd for  $\text{C}_{16}\text{H}_{12}\text{ClNO}_2\text{S}$   $[\text{M}]^+$  317.0277, found 317.0273.

**(E)-Diethyl 2-(5-chloro-1H-indol-2-yl)vinylphosphonate (4i)**

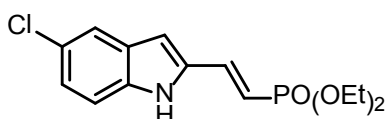

$^1\text{H}$  NMR (700 MHz,  $\text{CDCl}_3$ )  $\delta$  10.86 (br s, 1H), 7.54 (d,  $J = 1.9$  Hz, 1H), 7.41 (dd,  $J = 22.4, 17.4$  Hz, 1H), 7.30 (d,  $J = 8.6$  Hz, 1H), 6.64 (s, 1H), 6.38 (t,  $J = 17.8$  Hz, 1H), 4.15–4.10 (m, 4H), 1.33 (t,  $J = 7.0$  Hz, 6H);  $^{13}\text{C}$  NMR (175 MHz,  $\text{CDCl}_3$ )  $\delta$  138.6 (d,  $J_{\text{C-P}} = 5.7$  Hz), 136.3, 135.5 (d,  $J_{\text{C-P}} = 25.7$  Hz), 129.0, 125.5, 124.2, 120.4, 112.5, 111.0 (d,  $J_{\text{C-P}} = 193.6$  Hz), 106.0, 62.3, 62.2, 16.4, 16.3; IR (KBr)  $\nu$  3180, 2978, 2030, 1610, 1574, 1443, 1420, 1316, 1214, 1132, 1045, 1021, 960, 855, 792  $\text{cm}^{-1}$ ; HRMS (EI) calcd for  $\text{C}_{14}\text{H}_{17}\text{ClNO}_3\text{P}$   $[\text{M}]^+$  313.0635, found 313.0642.

**(E)-Methyl 3-(5-chloro-1H-indol-2-yl)but-2-enoate (4j)**

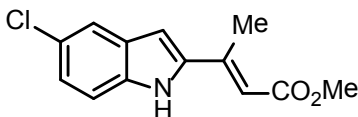

$^1\text{H}$  NMR (700 MHz,  $\text{CDCl}_3$ )  $\delta$  8.33 (br s, 1H), 7.55 (d,  $J = 7.9$  Hz, 1H), 7.24 (d,  $J = 7.7$  Hz, 1H), 7.17 (dd,  $J = 8.6, 1.9$  Hz, 1H), 6.78 (s, 1H), 6.15 (s, 1H), 3.75 (s, 3H), 2.59 (s, 3H);  $^{13}\text{C}$

NMR (175 MHz, CDCl<sub>3</sub>)  $\delta$  167.0, 145.2, 139.1, 135.4, 129.4, 126.1, 124.5, 120.6, 113.0, 112.1, 104.8, 51.3, 16.0; IR (KBr)  $\nu$  3337, 2927, 2856, 2030, 1714, 1672, 1604, 1517, 1437, 1315, 1283, 1199, 1154, 1060, 912, 858, 793 cm<sup>-1</sup>; HRMS (EI) calcd for C<sub>13</sub>H<sub>12</sub>ClNO<sub>2</sub> [M]<sup>+</sup> 249.0557, found 249.0554.

### 2-Bicyclo[2.2.1]heptan-2-yl-5-chloro-1H-indole (4k)

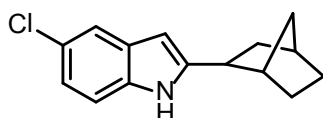

<sup>1</sup>H NMR (700 MHz, CDCl<sub>3</sub>)  $\delta$  7.85 (br s, 1H), 7.45 (d, *J* = 2.0 Hz, 1H), 7.16 (d, *J* = 8.4 Hz, 1H), 7.04 (dd, *J* = 8.4, 1.9 Hz, 1H), 6.13 (s, 1H), 2.78 (t, *J* = 6.7 Hz, 1H), 2.42–2.36 (m, 2H), 1.75–1.73 (m, 2H), 1.63–1.56 (m, 2H), 1.48–1.45 (m, 1H), 1.34–1.32 (m, 1H), 1.28–1.25 (m, 1H), 1.20–1.19 (m, 1H); <sup>13</sup>C NMR (175 MHz, CDCl<sub>3</sub>)  $\delta$  146.4, 134.2, 129.6, 125.0, 121.1, 119.2, 111.1, 97.9, 42.6, 41.2, 37.3, 36.3, 36.2, 29.7, 28.8; IR (KBr)  $\nu$  3415, 2950, 2869, 1708, 1575, 1539, 1459, 1408, 1305, 1204, 1150, 1058, 913, 863, 781 cm<sup>-1</sup>; HRMS (EI) calcd for C<sub>15</sub>H<sub>16</sub>ClN [M]<sup>+</sup> 245.0971, found 245.0977.

### (*E*)-5-Chloro-2-(perfluorostyryl)-1H-indole (4l)

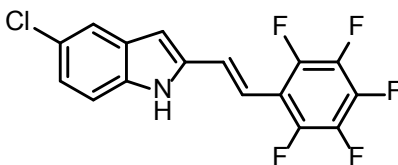

<sup>1</sup>H NMR (700 MHz, CDCl<sub>3</sub>)  $\delta$  8.28 (br s, 1H), 7.54 (d, *J* = 1.9 Hz, 1H), 7.40 (d, *J* = 16.8 Hz, 1H), 7.26 (d, *J* = 8.6 Hz, 1H), 7.16 (dd, *J* = 8.6, 2.0 Hz, 1H), 6.76 (d, *J* = 16.8 Hz, 1H), 6.64 (s, 1H); <sup>13</sup>C NMR (175 MHz, CDCl<sub>3</sub>)  $\delta$  144.7 (d, *J*<sub>C-F</sub> = 247.1 Hz), 137.8 (d, *J*<sub>C-F</sub> = 248.2 Hz), 136.5, 136.3 (d, *J*<sub>C-F</sub> = 240.4 Hz), 135.6, 129.6, 129.4, 126.6, 126.1, 124.0, 120.4, 111.8, 111.5, 105.3; IR (KBr)  $\nu$  3460, 2924, 2029, 1962, 1493, 1415, 1308, 1226, 1151, 1006, 955, 868, 792 cm<sup>-1</sup>; HRMS (EI) calcd for C<sub>16</sub>H<sub>7</sub>ClF<sub>5</sub>N [M]<sup>+</sup> 343.0187, found 343.0175.

**(2*E*,2'*E*)-Diethyl 3,3'-(1*H*-pyrrole-2,5-diyl)diacrylate (6a)**

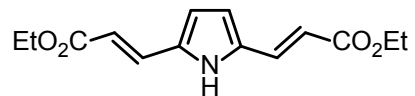

$^1\text{H}$  NMR (700 MHz,  $\text{CDCl}_3$ )  $\delta$  9.88 (br s, 1H), 7.52 (d,  $J = 15.9$  Hz, 2H), 6.53 (d,  $J = 2.3$  Hz, 2H), 6.35 (d,  $J = 15.9$  Hz, 2H), 4.27 (q,  $J = 7.1$  Hz, 4H), 1.31 (t,  $J = 7.0$  Hz, 6H);  $^{13}\text{C}$  NMR (175 MHz,  $\text{CDCl}_3$ )  $\delta$  167.8, 133.6, 132.4, 116.1, 114.4, 60.9, 14.5; IR (KBr)  $\nu$  3329, 2923, 2853, 1708, 1682, 1622, 1546, 1366, 1271, 1168, 1047, 1035, 965, 862, 788  $\text{cm}^{-1}$ ; HRMS (EI) calcd for  $\text{C}_{14}\text{H}_{17}\text{NO}_4$   $[\text{M}]^+$  263.1158, found 263.1164.

**(2*E*,2'*E*)-Dibutyl 3,3'-(1*H*-pyrrole-2,5-diyl)diacrylate (6b)**

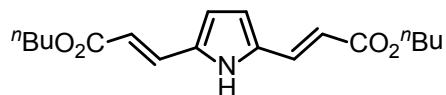

$^1\text{H}$  NMR (700 MHz,  $\text{CDCl}_3$ )  $\delta$  10.28 (br s, 1H), 7.52 (d,  $J = 15.9$  Hz, 2H), 6.53 (d,  $J = 2.3$  Hz, 2H), 6.40 (d,  $J = 15.9$  Hz, 2H), 4.21 (t,  $J = 6.5$  Hz, 4H), 1.67–1.63 (m, 4H), 1.43–1.34 (m, 4H), 0.93 (t,  $J = 7.3$  Hz, 6H);  $^{13}\text{C}$  NMR (175 MHz,  $\text{CDCl}_3$ )  $\delta$  168.0, 133.7, 132.5, 116.1, 114.3, 64.9, 31.0, 19.4, 13.9; IR (KBr)  $\nu$  3333, 2954, 1704, 1678, 1619, 1545, 1463, 1385, 1276, 1162, 1062, 1001, 965, 864, 785  $\text{cm}^{-1}$ ; HRMS (EI) calcd for  $\text{C}_{18}\text{H}_{25}\text{NO}_4$   $[\text{M}]^+$  319.1784, found 319.1780.

**(2*E*,2'*E*)-Benzyl 3,3'-(1*H*-pyrrole-2,5-diyl)diacrylate (6c)**

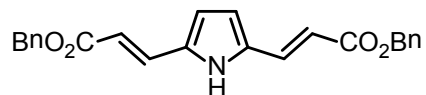

$^1\text{H}$  NMR (700 MHz,  $\text{CDCl}_3$ )  $\delta$  9.88 (br s, 1H), 7.54 (d,  $J = 15.9$  Hz, 2H), 7.40–7.25 (m, 10H), 6.53 (d,  $J = 2.1$  Hz, 2H), 6.40 (d,  $J = 15.9$  Hz, 2H), 5.23–5.19 (m, 4H);  $^{13}\text{C}$  NMR (175 MHz,  $\text{CDCl}_3$ )  $\delta$  167.5, 136.1, 134.0, 132.5, 128.7, 128.5, 128.4, 116.4, 114.1, 66.7; IR (KBr)  $\nu$  3335, 2927, 1960, 1686, 1620, 1544, 1455, 1414, 1377, 1260, 1154, 1008, 971, 854, 784  $\text{cm}^{-1}$ ; HRMS (EI) calcd for  $\text{C}_{24}\text{H}_{21}\text{NO}_4$   $[\text{M}]^+$  387.1471, found 387.1473.

### Ethyl 2-(3-oxo-2-*p*-tolyl-2,3-dihydro-1H-imidazo[1,5-a]indol-1-yl)acetate (**3aa**)

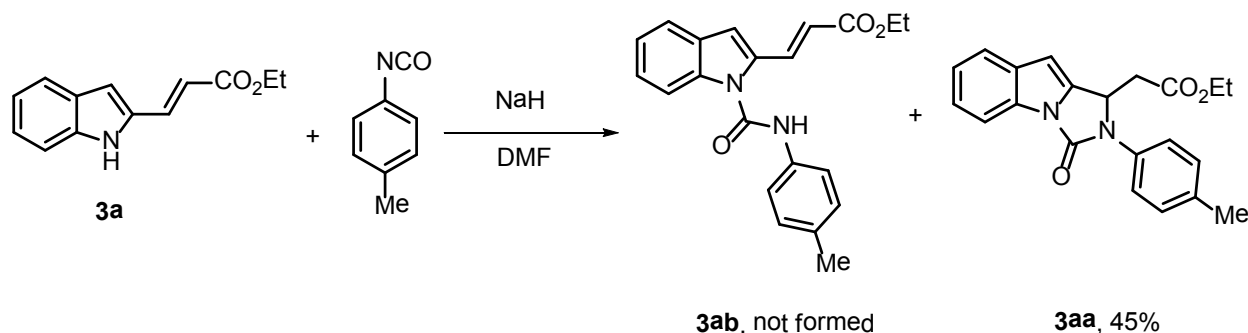

To a stirred suspension of **3a** (120 mg, 0.56 mmol) in dry DMF (2 mL) was added NaH (60% dispersion in mineral oil, 2.0 equiv.) at 0 °C under N<sub>2</sub> atmosphere. The reaction mixture was then stirred at room temperature for 3 h and *p*-tolyl isocyanate (1.5 equiv.) was added dropwise. The reaction mixture was then stirred at room temperature for overnight. The reaction mixture was washed with H<sub>2</sub>O and extracted with EtOAc (10 mL). The organic layer was then washed with an aqueous solution of 1 N HCl (10 mL). The organic layer was dried over Mg<sub>2</sub>SO<sub>4</sub> and concentrated in vacuo. The residue was purified by flash column chromatography.

<sup>1</sup>H NMR (700 MHz, CDCl<sub>3</sub>) δ 8.04 (d, *J* = 8.0 Hz, 1H), 7.58 (d, *J* = 7.8 Hz, 1H), 7.37 (d, *J* = 8.4 Hz, 2H), 7.30 (t, *J* = 8.1 Hz, 1H), 7.25–7.23 (m, 3H), 6.43 (s, 1H), 5.59–5.57 (m, 1H), 4.14–4.11 (m, 2H), 3.00 (dd, *J* = 16.4, 4.1 Hz, 1H), 2.58 (dd, *J* = 15.1, 9.3 Hz, 1H), 2.35 (s, 3H), 1.97 (t, *J* = 7.1 Hz, 3H); <sup>13</sup>C NMR (175 MHz, CDCl<sub>3</sub>) δ 169.9, 150.1, 137.2, 136.1, 133.4, 133.1, 130.7, 130.2, 123.6, 123.5, 123.0, 121.3, 112.9, 98.8, 61.2, 53.9, 38.0, 21.1, 14.2; IR (KBr) ν 3332, 2924, 1962, 1680, 1610, 1540, 1457, 1414, 1377, 1240, 1144, 1008, 971, 854, 784 cm<sup>-1</sup>; HRMS (EI) calcd for C<sub>21</sub>H<sub>20</sub>N<sub>2</sub>O<sub>3</sub> [M]<sup>+</sup> 348.1474, found 348.1472.

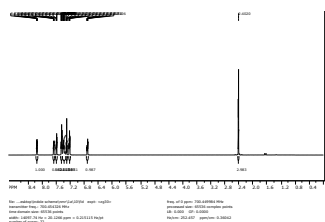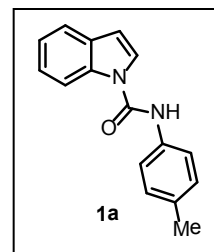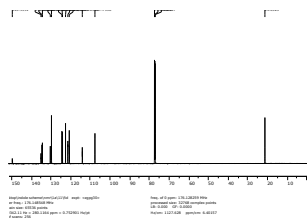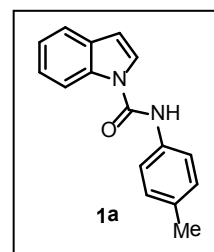



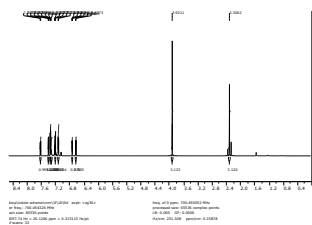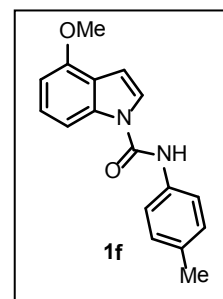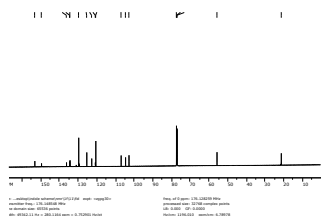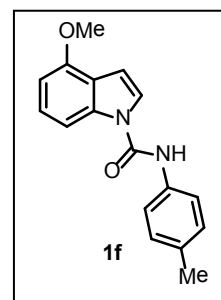

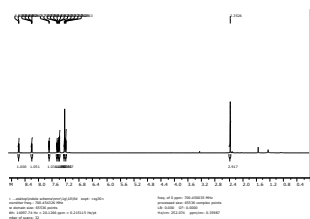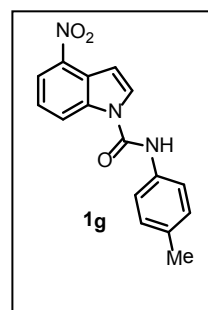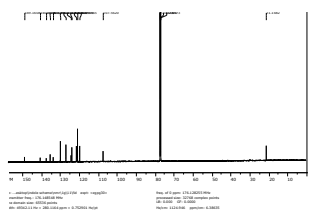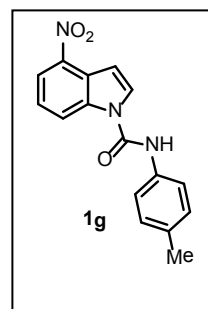

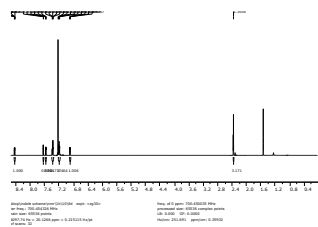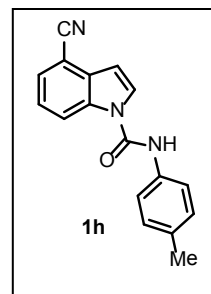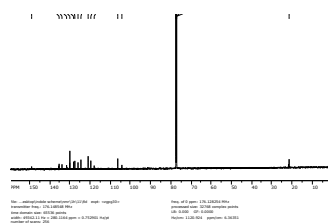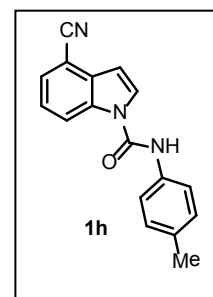

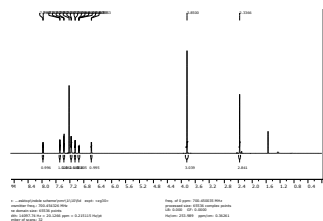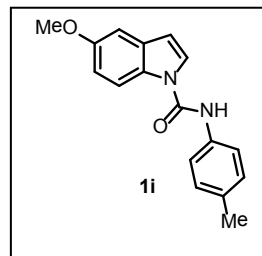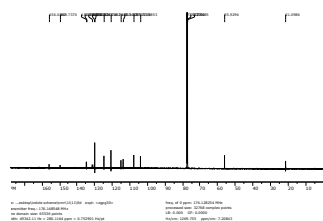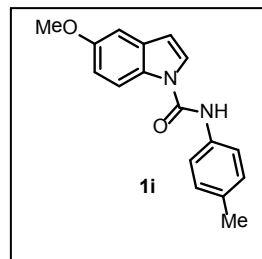

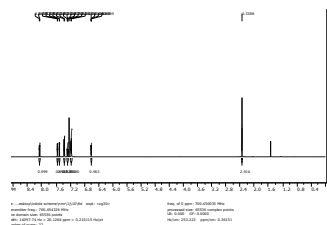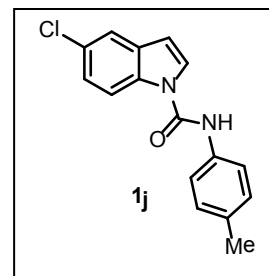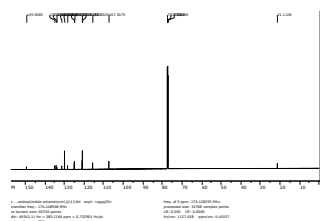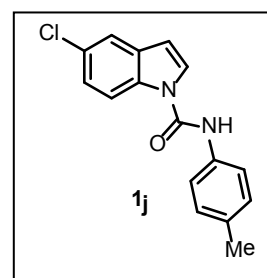

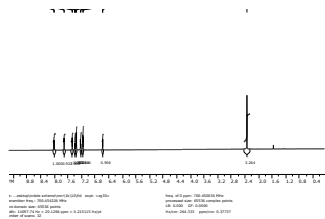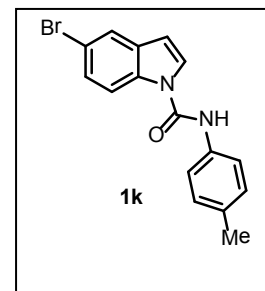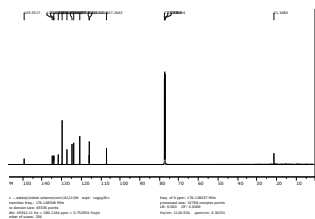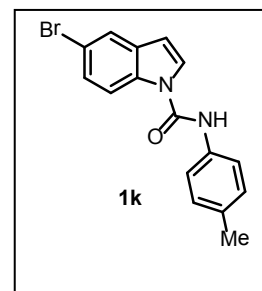

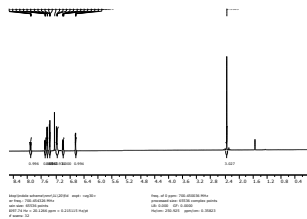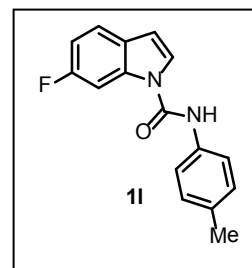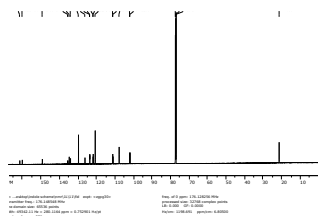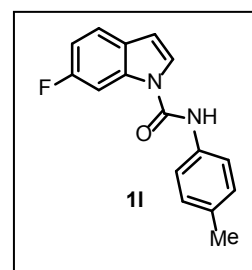

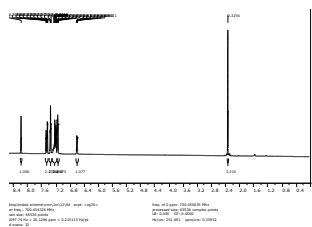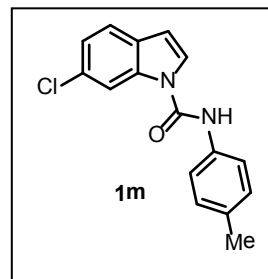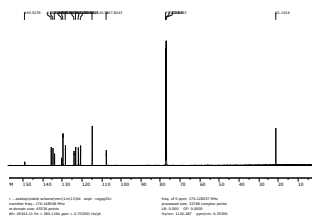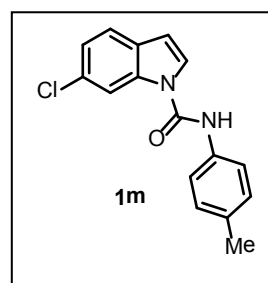



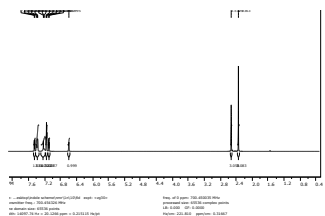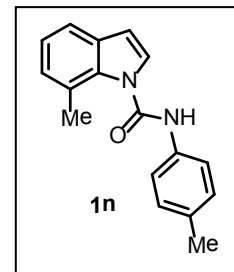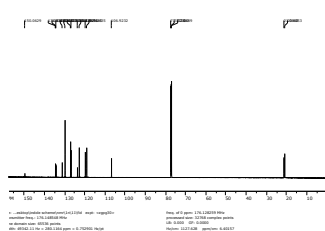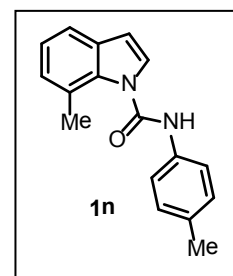

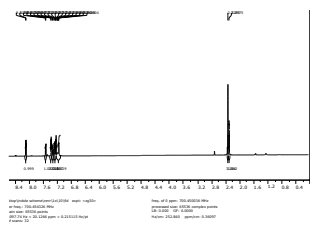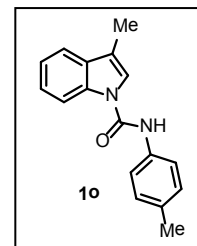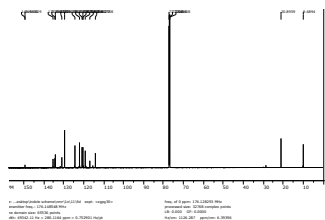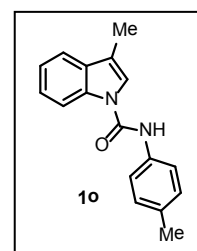

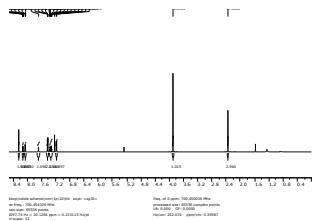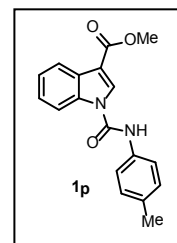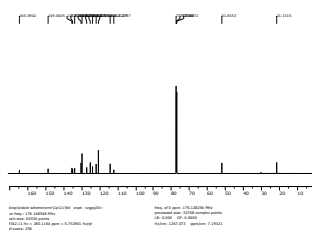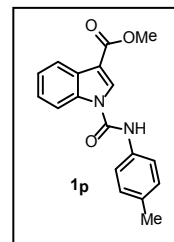



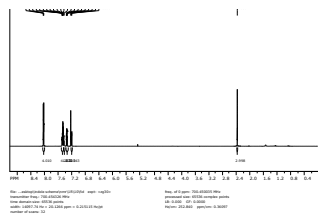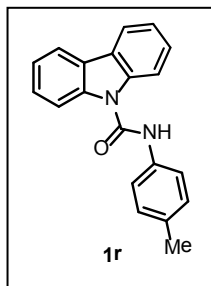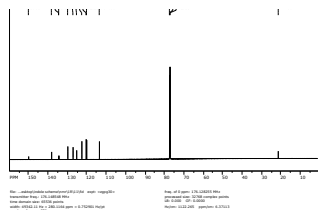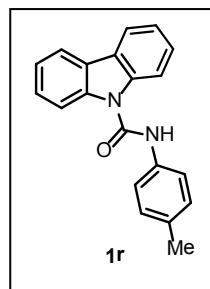



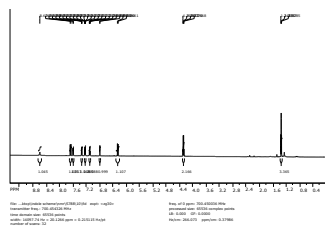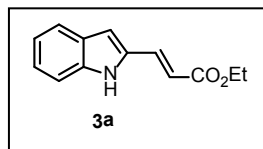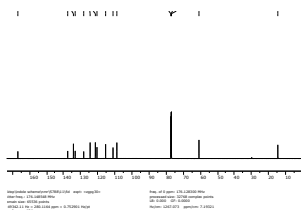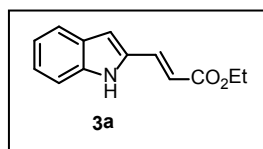

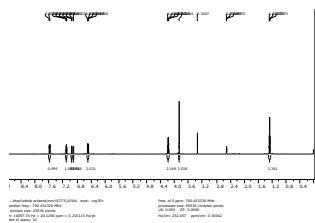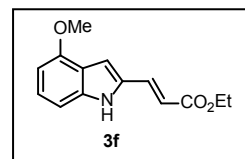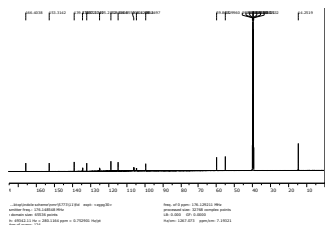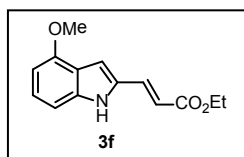



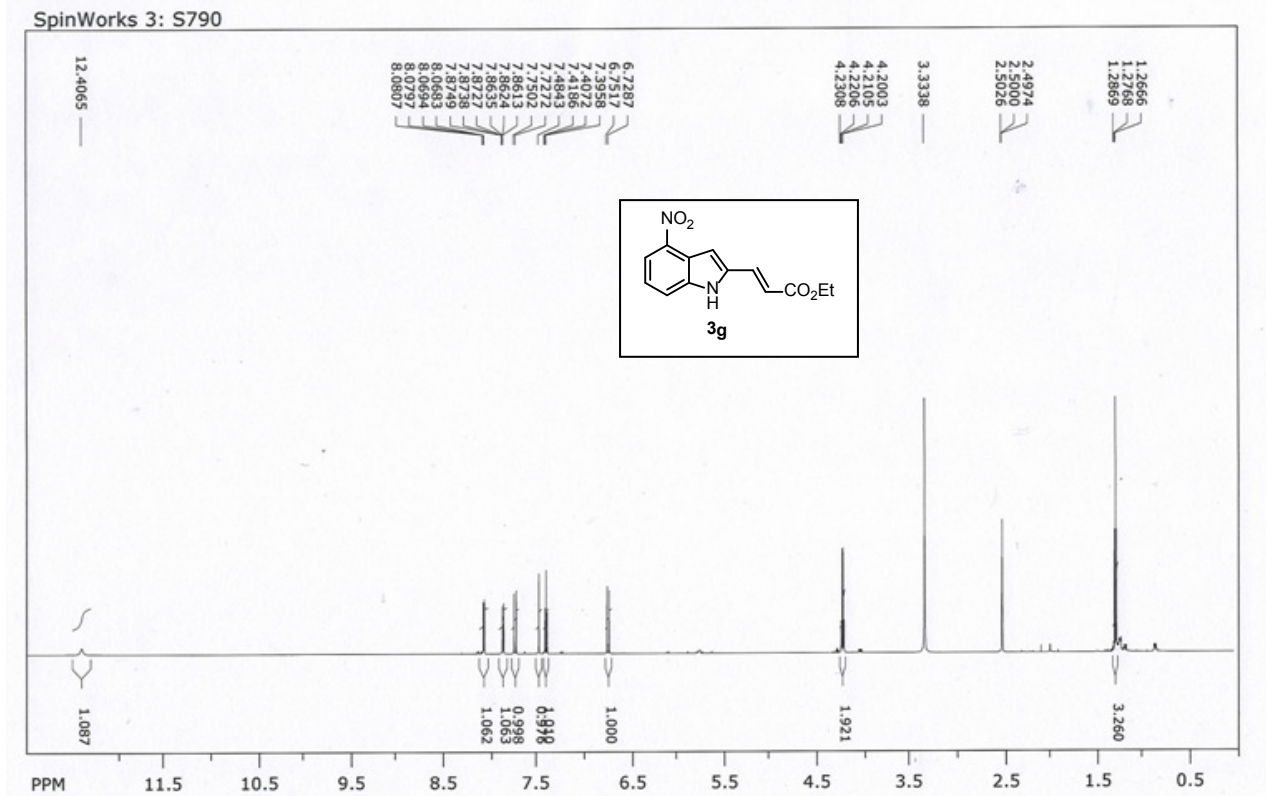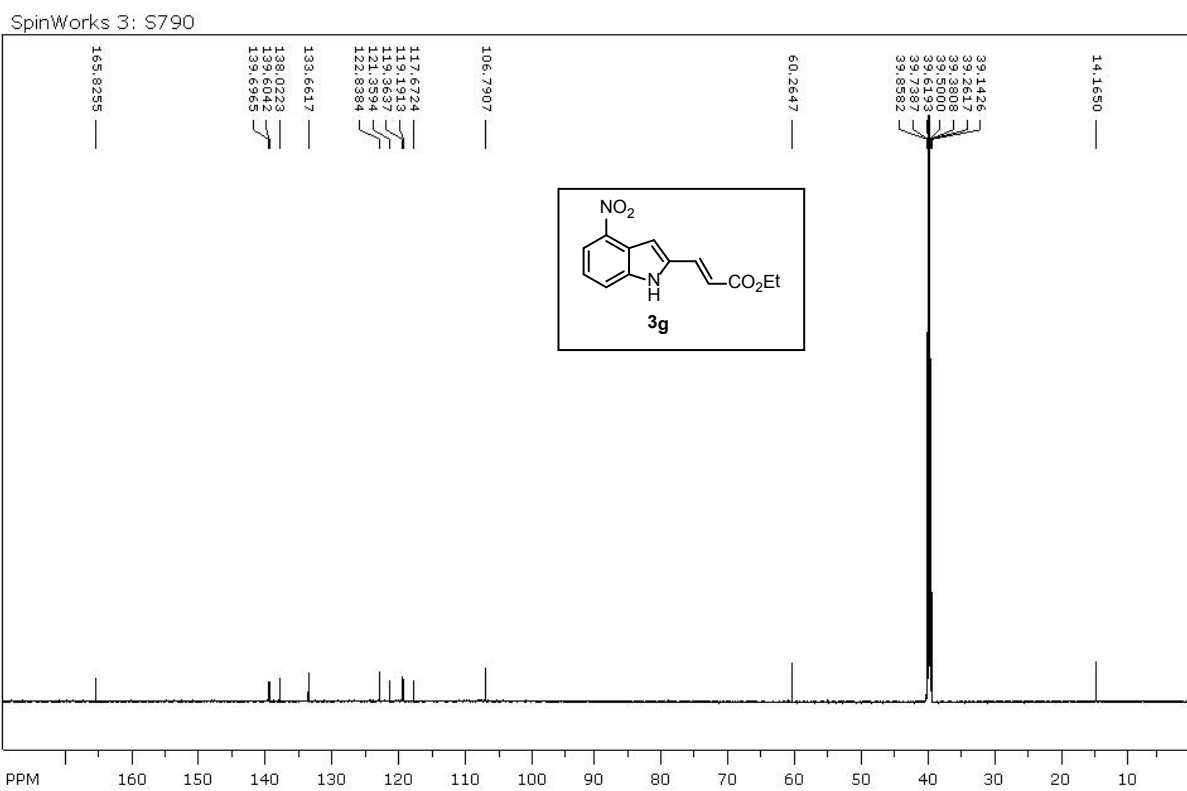

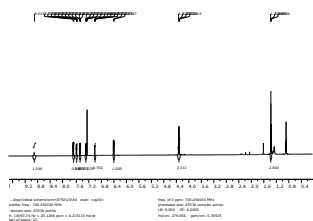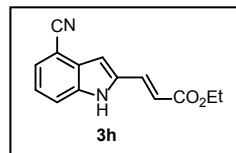

SpinWorks 3: S792

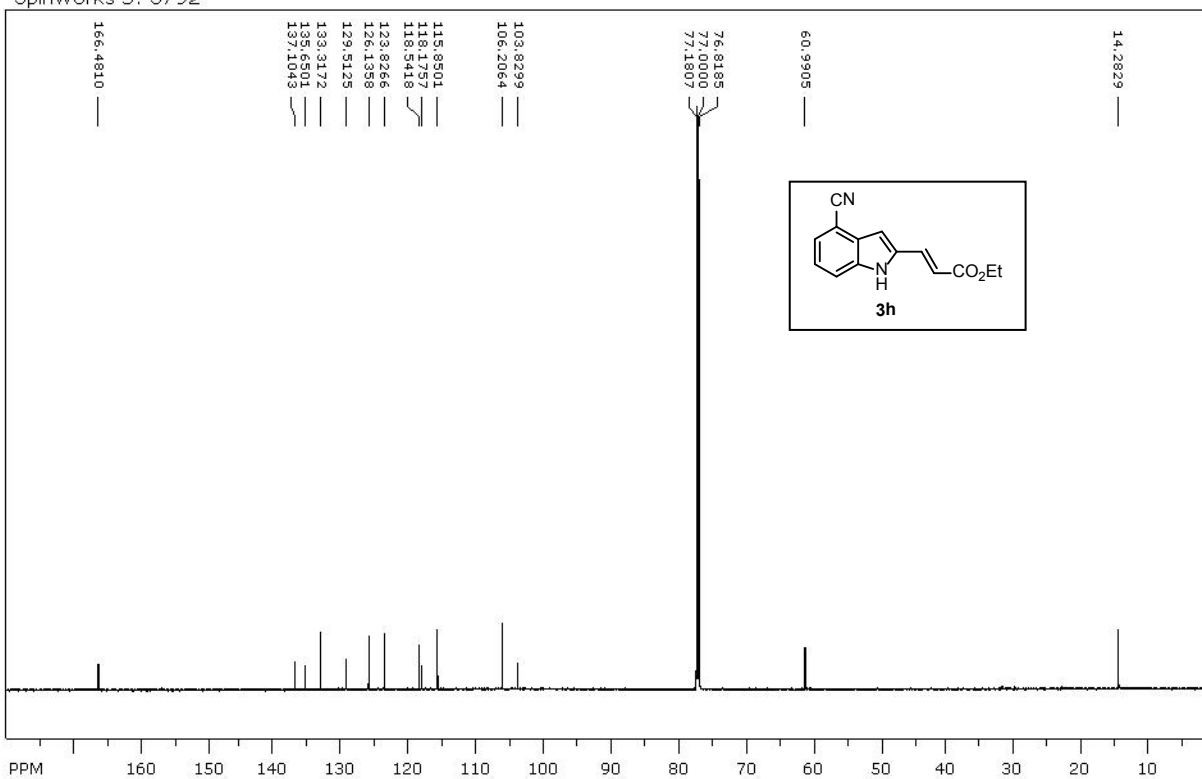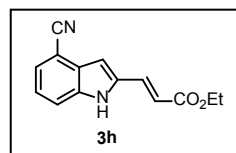

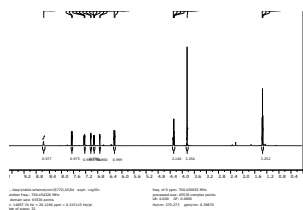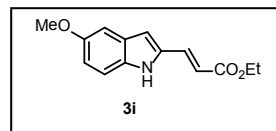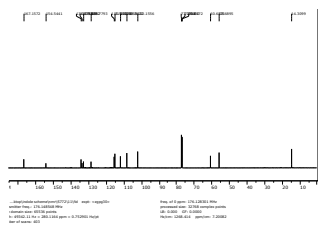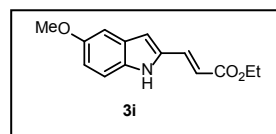

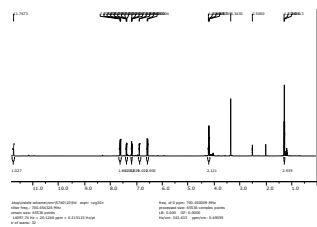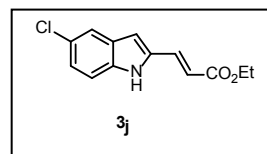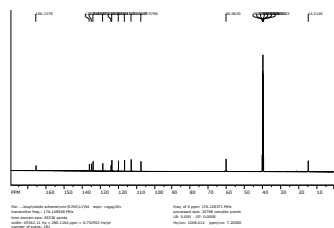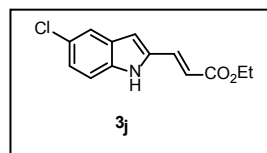



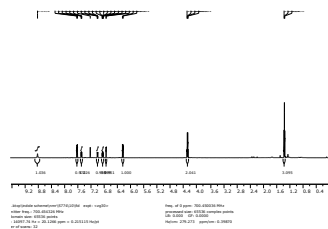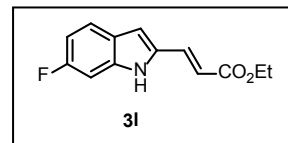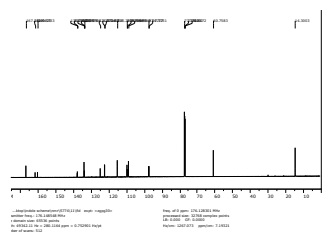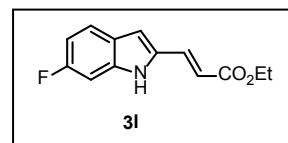

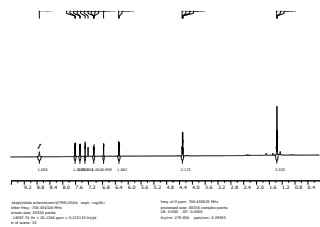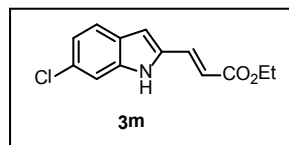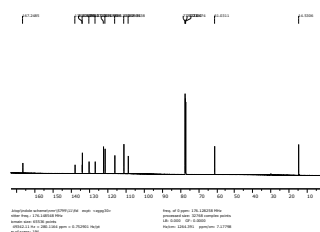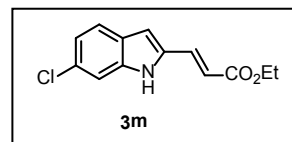

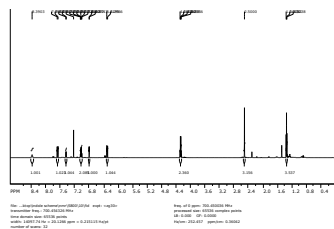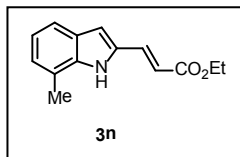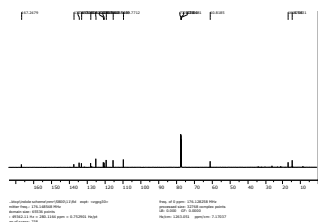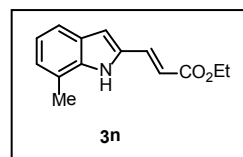



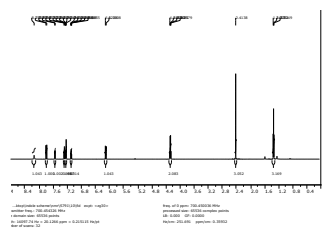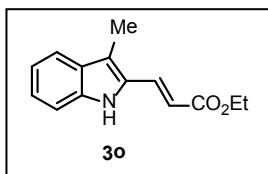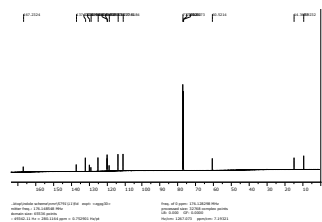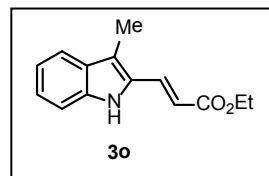

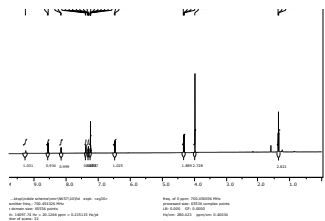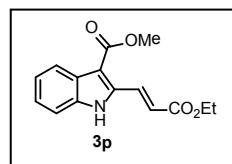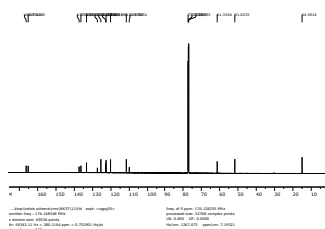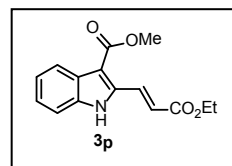

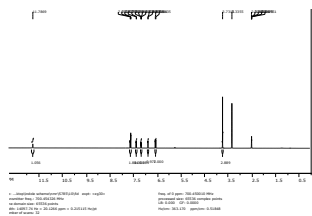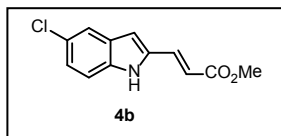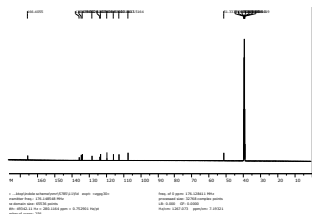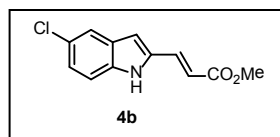

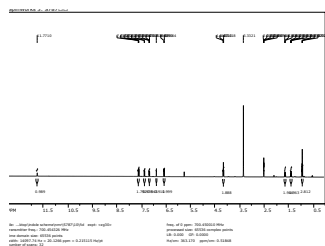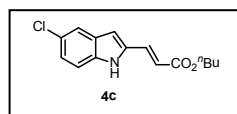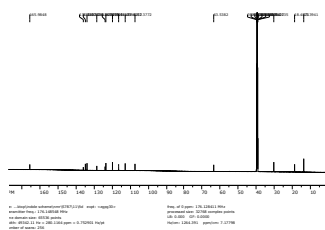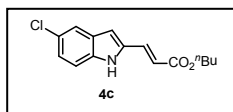

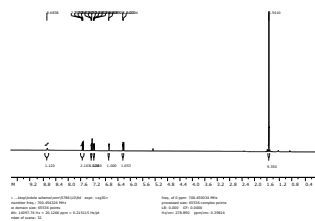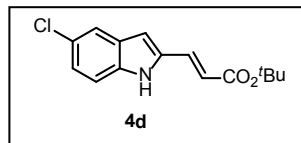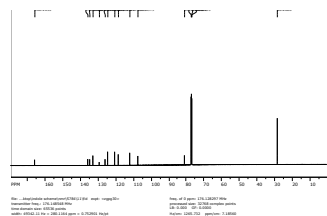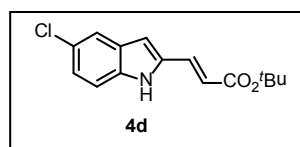

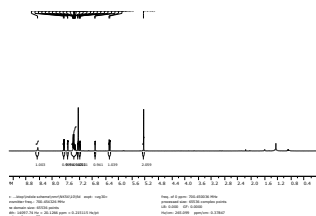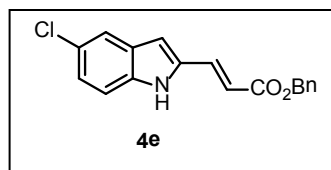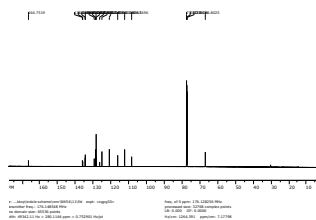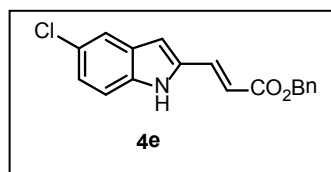

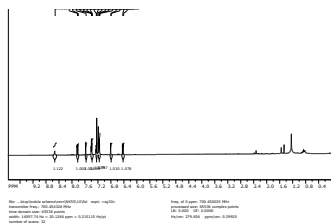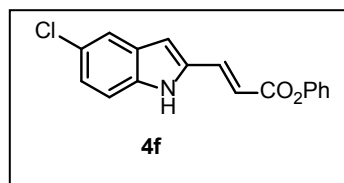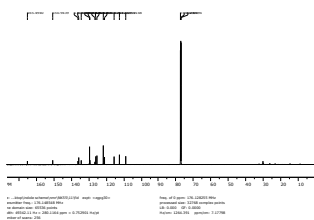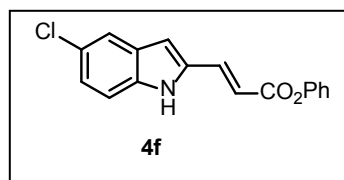

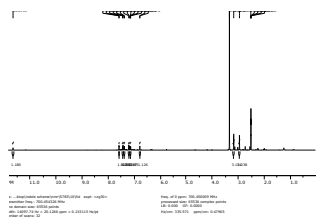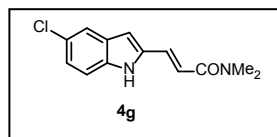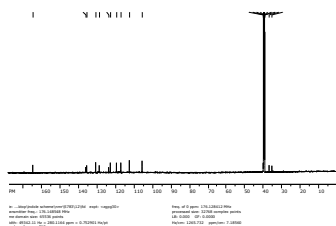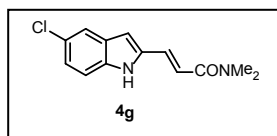



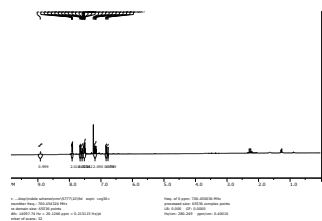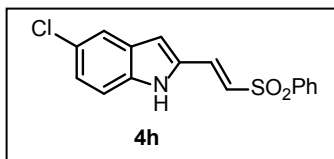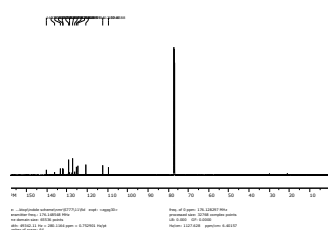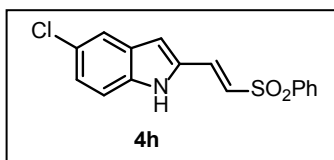

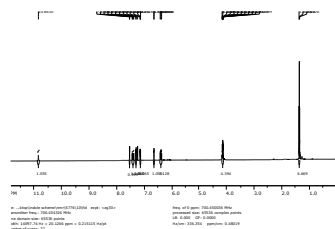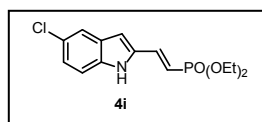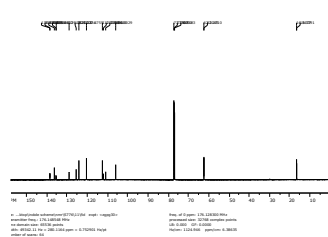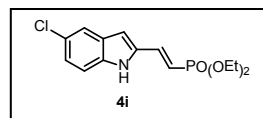

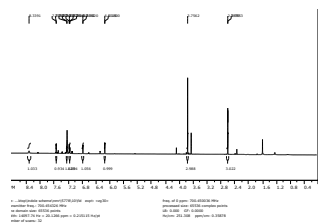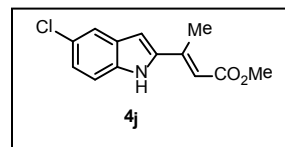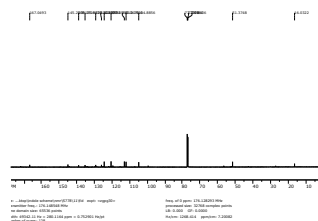

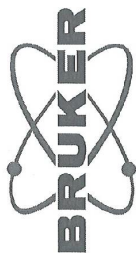

```

Current Data Parameters
NAME          S778
EXPNO        31
PROCNO       1

F2 - Acquisition Parameters
Date_         20131202
Time          16.51
INSTRUM      spect
PROBHD       5 mm CPXC-1
PULPROG      zgpg30
TD            65536
SOLVENT      CDCl3
NS            16
DS            32
SWH           10504.202 Hz
FIDRES        5.125935 Hz
AQ            0.0377287 sec
RG            47.600 usec
DE            10.00 usec
TE            295.1 K
DO            0.00003741 sec
D1            2.00000000 sec
d2            0.30000000 sec
DE1           0.00000000 sec
D12           0.00020000 sec
D16           0.00020000 sec
IN0           0.00009520 sec

===== CHANNEL f1 =====
SFO1          700.454533 MHz
NUC1          13C
P1            8.00 usec
PL1           0.00 dB
P2            16.00 usec
PL2           0.00 dB
PL12          9.50000000 W
PL10          0.89941001 W

===== GRADIENT CHANNEL =====
GENDM[1]     SUGRA100 &
GP21         40.00 usec
PT6          1000.00 usec

F1 - Acquisition parameters
TD            256
SFO1          700.4546 MHz
FIDRES        41.032040 Hz
AQ            0.0377287 sec
RG            47.600 usec
DE            10.00 usec
TE            295.1 K
DO            0.00003741 sec
D1            2.00000000 sec
d2            0.30000000 sec
DE1           0.00000000 sec
D12           0.00020000 sec
D16           0.00020000 sec
IN0           0.00009520 sec

F2 - Processing parameters
SI            1024
SF            700.4500077 MHz
WDW           OSLINE
SSB           0 Hz
GB            0
PC            1.00

F1 - Processing parameters
SI            1024
MC2           States-TPPI
NUC2          13C
FREQ2         700.4500077 MHz
PULPROG      zgpg30
SOLVENT       CDCl3
SSB           0 Hz
LB            0 Hz
GB            0
    
```

S778

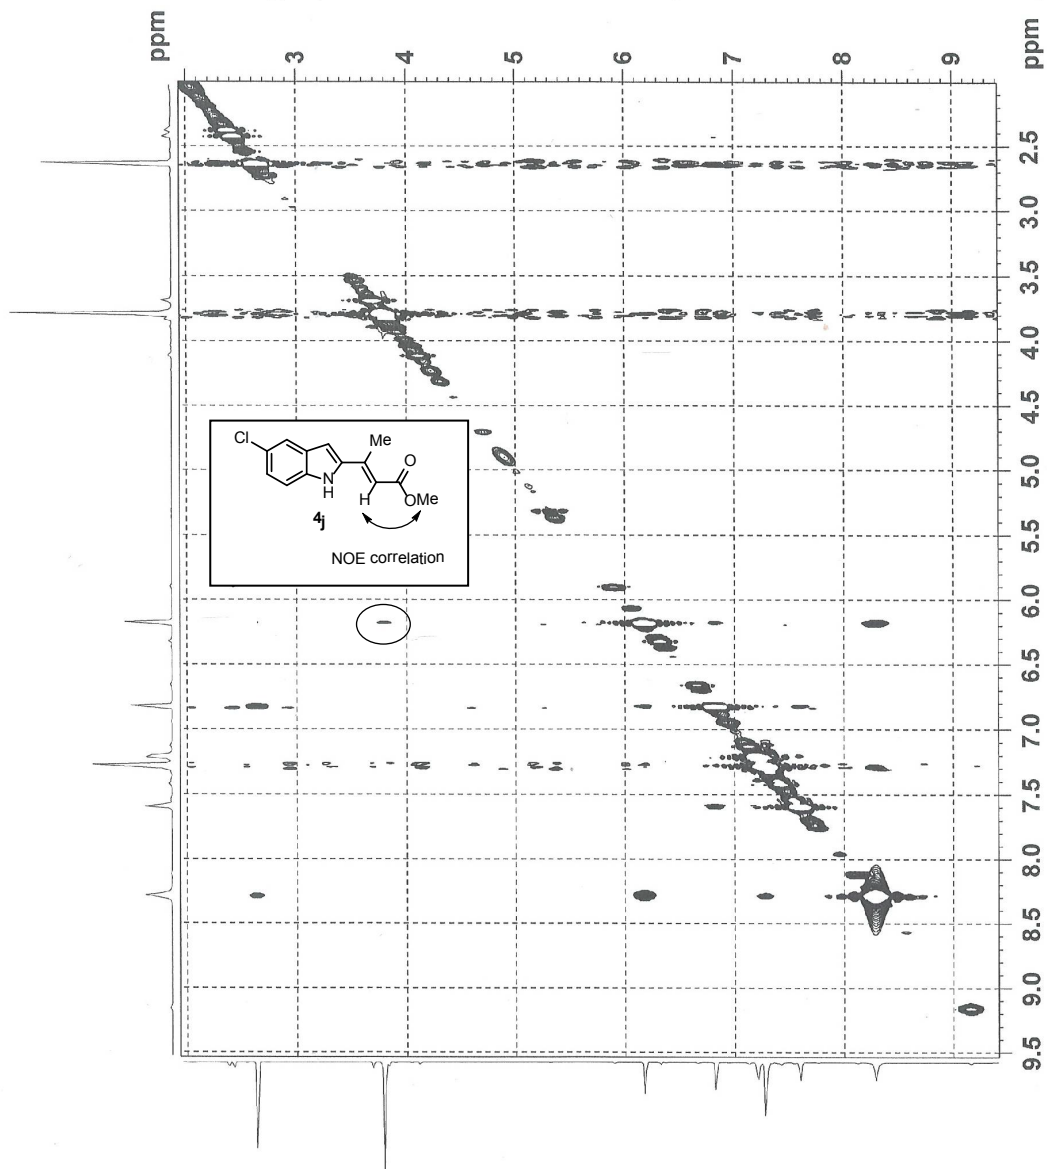

S60

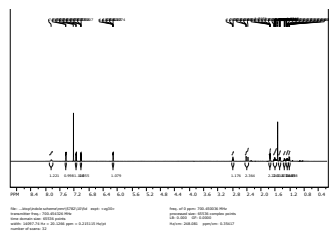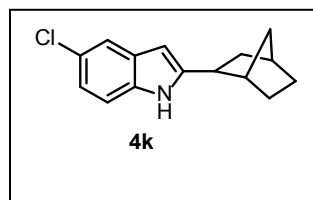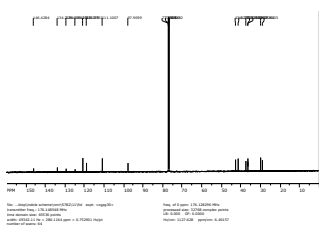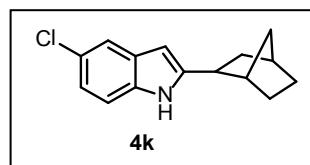

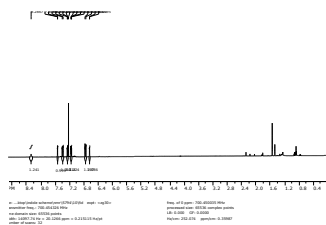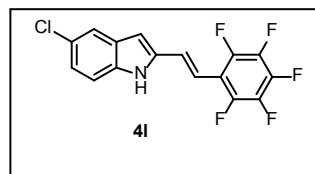

SpinWorks 3: S794

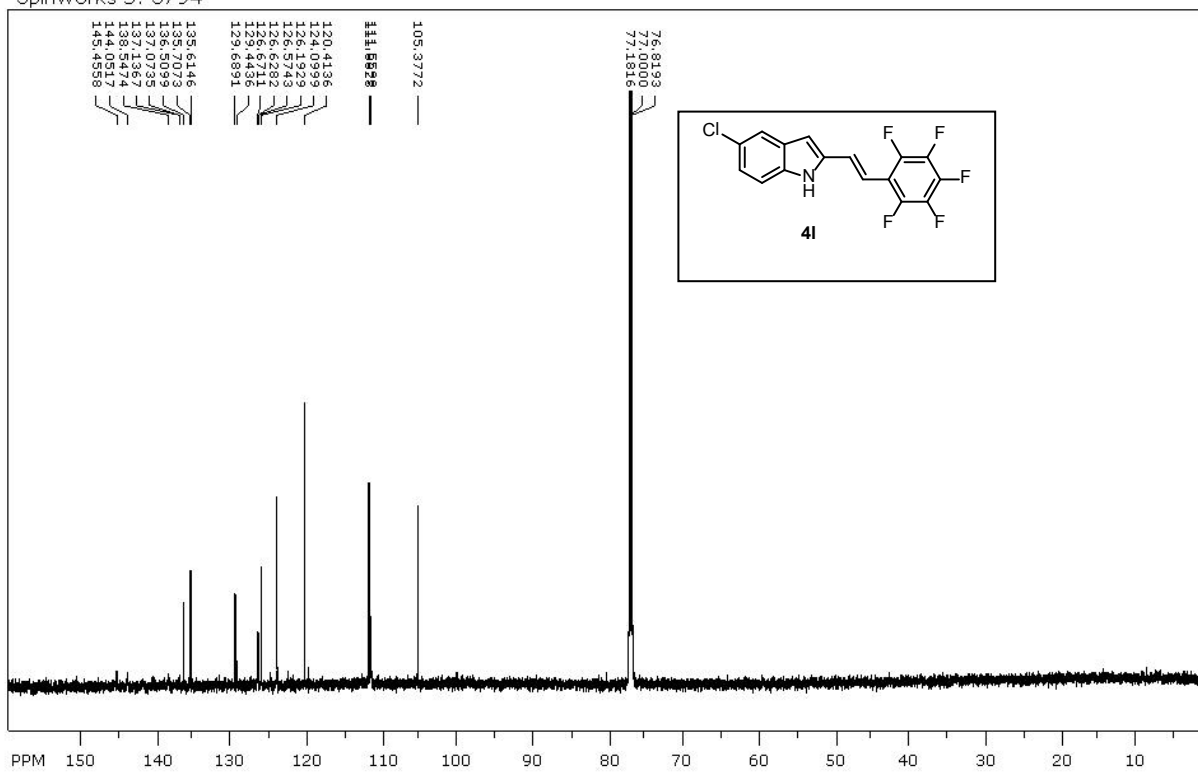



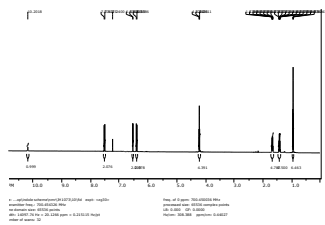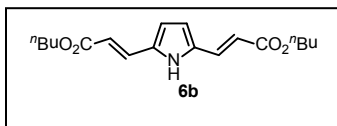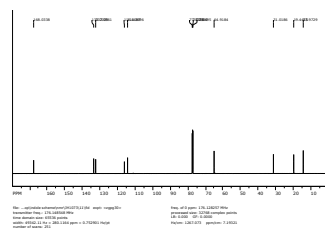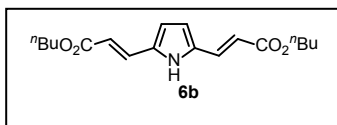



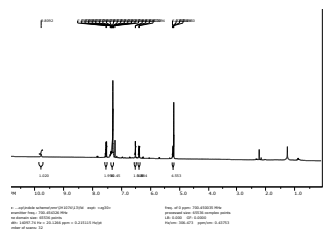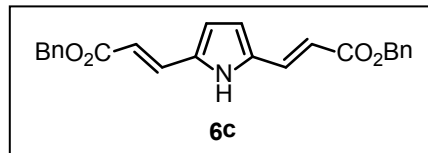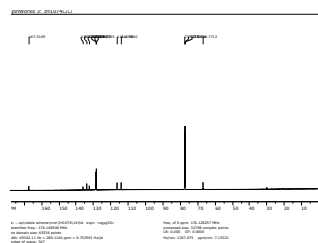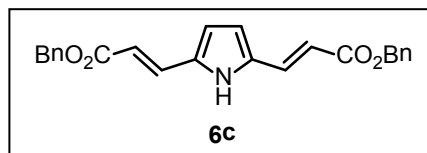

Supplement: c3ob42605j.pdf [file c3ob42605j.pdf]
